# Supplementary material for: Clindanones A and B and cladosporols F and G, polyketides from the deep-sea derived fungus Cladosporium cladosporioides HDN14-342
Source: Royal Society of Chemistry journal article supplement (doi:10.1039/c6ra14640f), 2016-01-01

## Supplementary Information

# Clindanones A and B and Cladosporols F and G, Polyketides from a Deep-sea Derived Fungus *Cladosporium cladosporioides* HDN14-342

Zhenzhen Zhang,<sup>a</sup> Xueqian He,<sup>a</sup> Congcong Liu,<sup>a</sup> Qian Che,<sup>a</sup> Tianjiao Zhu,<sup>a</sup> Qianqun Gu,<sup>a</sup> and  
Dehai Li<sup>\*a</sup>

<sup>a</sup>Key Laboratory of Marine Drugs, Chinese Ministry of Education, School of Medicine and  
Pharmacy, Ocean University of China, Qingdao 266003, People's Republic of China.

## List of Supplementary information

|                                                                                                      |    |
|------------------------------------------------------------------------------------------------------|----|
| <b>Figure S1.</b> $^1\text{H}$ NMR (500 MHz, acetone- $d_6$ ) spectrum of <b>1</b> .                 | 4  |
| <b>Figure S2.</b> $^{13}\text{C}$ NMR (125 MHz, acetone- $d_6$ ) spectrum of <b>1</b> .              | 4  |
| <b>Figure S3.</b> DEPT (125 MHz, acetone- $d_6$ ) spectrum of <b>1</b> .                             | 5  |
| <b>Figure S4.</b> HSQC spectrum of <b>1</b> in acetone- $d_6$ .                                      | 5  |
| <b>Figure S5.</b> $^1\text{H}$ - $^1\text{H}$ COSY spectrum of <b>1</b> in acetone- $d_6$ .          | 6  |
| <b>Figure S6.</b> HMBC spectrum of <b>1</b> in acetone- $d_6$ .                                      | 6  |
| <b>Figure S7.</b> HRESIMS spectrum of <b>1</b> .                                                     | 7  |
| <b>Figure S8.</b> $^1\text{H}$ NMR (500 MHz, acetone- $d_6$ ) spectrum of <b>2</b> .                 | 7  |
| <b>Figure S9.</b> $^{13}\text{C}$ NMR (125 MHz, acetone- $d_6$ ) spectrum of <b>2</b> .              | 8  |
| <b>Figure S10.</b> DEPT (125 MHz, acetone- $d_6$ ) spectrum of <b>2</b> .                            | 8  |
| <b>Figure S11.</b> HSQC spectrum of <b>2</b> in acetone- $d_6$ .                                     | 9  |
| <b>Figure S12.</b> $^1\text{H}$ - $^1\text{H}$ COSY spectrum of <b>2</b> in acetone- $d_6$ .         | 9  |
| <b>Figure S13.</b> HMBC spectrum of <b>2</b> in acetone- $d_6$ .                                     | 10 |
| <b>Figure S14.</b> HRESIMS spectrum of <b>2</b> .                                                    | 10 |
| <b>Figure S15.</b> $^1\text{H}$ NMR (500 MHz, DMSO- $d_6$ ) spectrum of <b>3</b> .                   | 11 |
| <b>Figure S16.</b> $^{13}\text{C}$ NMR (125 MHz, DMSO- $d_6$ ) spectrum of <b>3</b> .                | 11 |
| <b>Figure S17.</b> DEPT (125 MHz, DMSO- $d_6$ ) spectrum of <b>3</b> .                               | 12 |
| <b>Figure S18.</b> HSQC spectrum of <b>3</b> in DMSO- $d_6$ .                                        | 12 |
| <b>Figure S19.</b> $^1\text{H}$ - $^1\text{H}$ COSY spectrum of <b>3</b> in DMSO- $d_6$ .            | 13 |
| <b>Figure S20.</b> HMBC spectrum of <b>3</b> in DMSO- $d_6$ .                                        | 13 |
| <b>Figure S21.</b> HRESIMS spectrum of <b>3</b> .                                                    | 14 |
| <b>Figure S22.</b> $^1\text{H}$ NMR (500 MHz, $\text{CD}_3\text{OD}$ ) spectrum of <b>4</b> .        | 14 |
| <b>Figure S23.</b> $^{13}\text{C}$ NMR (125 MHz, $\text{CD}_3\text{OD}$ ) spectrum of <b>4</b> .     | 15 |
| <b>Figure S24.</b> DEPT (125 MHz, $\text{CD}_3\text{OD}$ ) spectrum of <b>4</b> .                    | 15 |
| <b>Figure S25.</b> HSQC spectrum of <b>4</b> in $\text{CD}_3\text{OD}$ .                             | 16 |
| <b>Figure S26.</b> $^1\text{H}$ - $^1\text{H}$ COSY spectrum of <b>4</b> in $\text{CD}_3\text{OD}$ . | 16 |
| <b>Figure S27.</b> HMBC spectrum of <b>4</b> in $\text{CD}_3\text{OD}$ .                             | 17 |

|                                                                                                                                       |    |
|---------------------------------------------------------------------------------------------------------------------------------------|----|
| <b>Figure S28.</b> HRESIMS spectrum of <b>4</b> .....                                                                                 | 17 |
| <b>Figure S29.</b> <sup>1</sup> H NMR (500 MHz, DMSO- <i>d</i> <sub>6</sub> ) spectrum of <b>4</b> .....                              | 18 |
| <b>Figure S30.</b> <sup>13</sup> C NMR (125 MHz, DMSO- <i>d</i> <sub>6</sub> ) spectrum of <b>4</b> .....                             | 18 |
| <b>Figure S31.</b> DEPT (125 MHz, DMSO- <i>d</i> <sub>6</sub> ) spectrum of <b>4</b> .....                                            | 19 |
| <b>Figure S32.</b> HSQC spectrum of <b>4</b> in DMSO- <i>d</i> <sub>6</sub> .....                                                     | 19 |
| <b>Figure S33.</b> <sup>1</sup> H- <sup>1</sup> H COSY spectrum of <b>4</b> in DMSO- <i>d</i> <sub>6</sub> .....                      | 20 |
| <b>Figure S34.</b> HMBC spectrum of <b>4</b> in DMSO- <i>d</i> <sub>6</sub> .....                                                     | 20 |
| <b>Figure S35.</b> <sup>1</sup> H NMR (500 MHz, CDCl <sub>3</sub> ) spectrum of <b>5</b> .....                                        | 21 |
| <b>Figure S36.</b> <sup>13</sup> C NMR (125 MHz, CDCl <sub>3</sub> ) spectrum of <b>5</b> .....                                       | 21 |
| <b>Figure S37.</b> DEPT (125 MHz, CDCl <sub>3</sub> ) spectrum of <b>5</b> .....                                                      | 22 |
| <b>Figure S38.</b> Major dimerized patterns of 1-tetralone dimmers.....                                                               | 22 |
| <b>Figure S39.</b> HPLC of HDN14-342 crude extract.....                                                                               | 23 |
| <b>Figure S40.</b> <sup>1</sup> H NMR (500 MHz, DMSO- <i>d</i> <sub>6</sub> ) spectrum of the mixture of <b>1</b> and <b>2</b> .....  | 23 |
| <b>Figure S41.</b> <sup>13</sup> C NMR (125 MHz, DMSO- <i>d</i> <sub>6</sub> ) spectrum of the mixture of <b>1</b> and <b>2</b> ..... | 24 |
| <b>Figure S42.</b> Chiral HPLC separation chromatogram of <b>1/2</b> on chiral Daicel Chiralpack IC column (250×4.6 mm, 5μm).....     | 24 |
| <b>Figure S43.</b> The structures of two reported synthetic tetralone and 1,3-indanone dimers.....                                    | 24 |
| <b>Figure S44.</b> ECD calculation of <b>1</b> .....                                                                                  | 25 |
| <b>Figure S45.</b> ECD calculation of <b>5</b> .....                                                                                  | 34 |
| <b>Figure S46.</b> ECD calculated spectra of four absolute configurations of <b>1</b> .....                                           | 39 |

**Figure S1.**  $^1\text{H}$  NMR (500 MHz, acetone- $d_6$ ) spectrum of **1**.

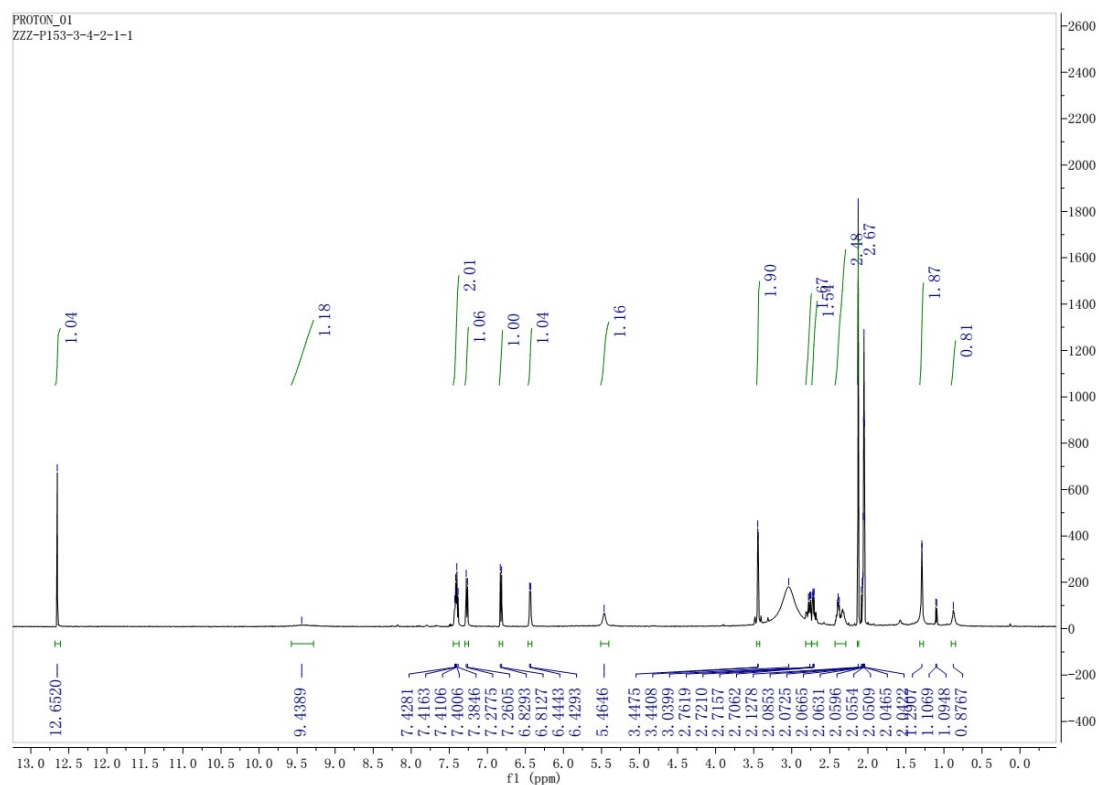

**Figure S2.**  $^{13}\text{C}$  NMR (125 MHz, acetone- $d_6$ ) spectrum of **1**.

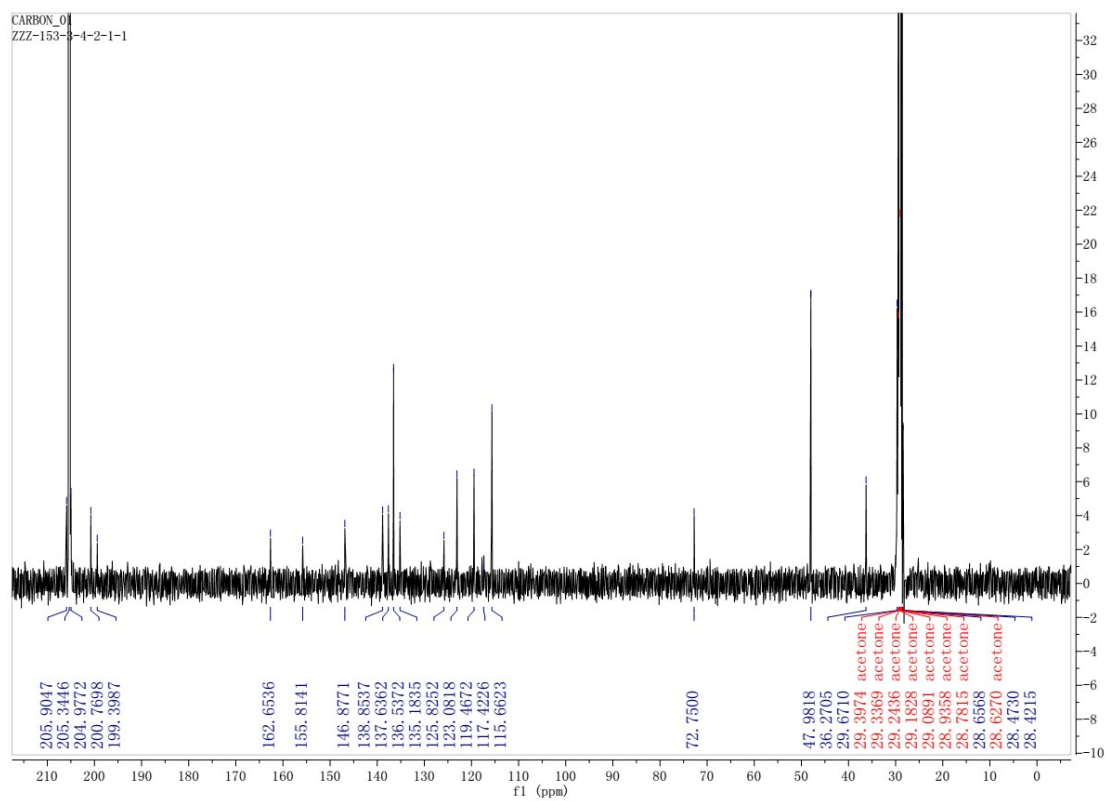

**Figure S3.** DEPT (125 MHz, acetone- $d_6$ ) spectrum of **1**.

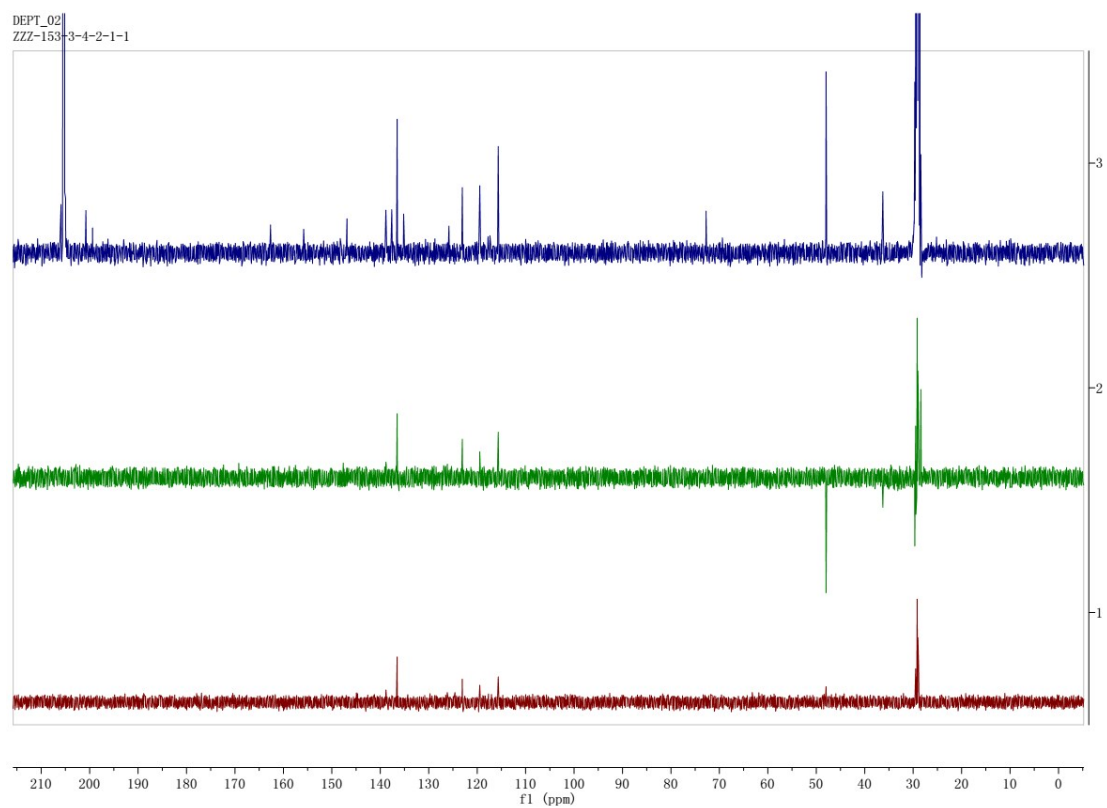

**Figure S4.** HSQC spectrum of **1** in acetone- $d_6$ .

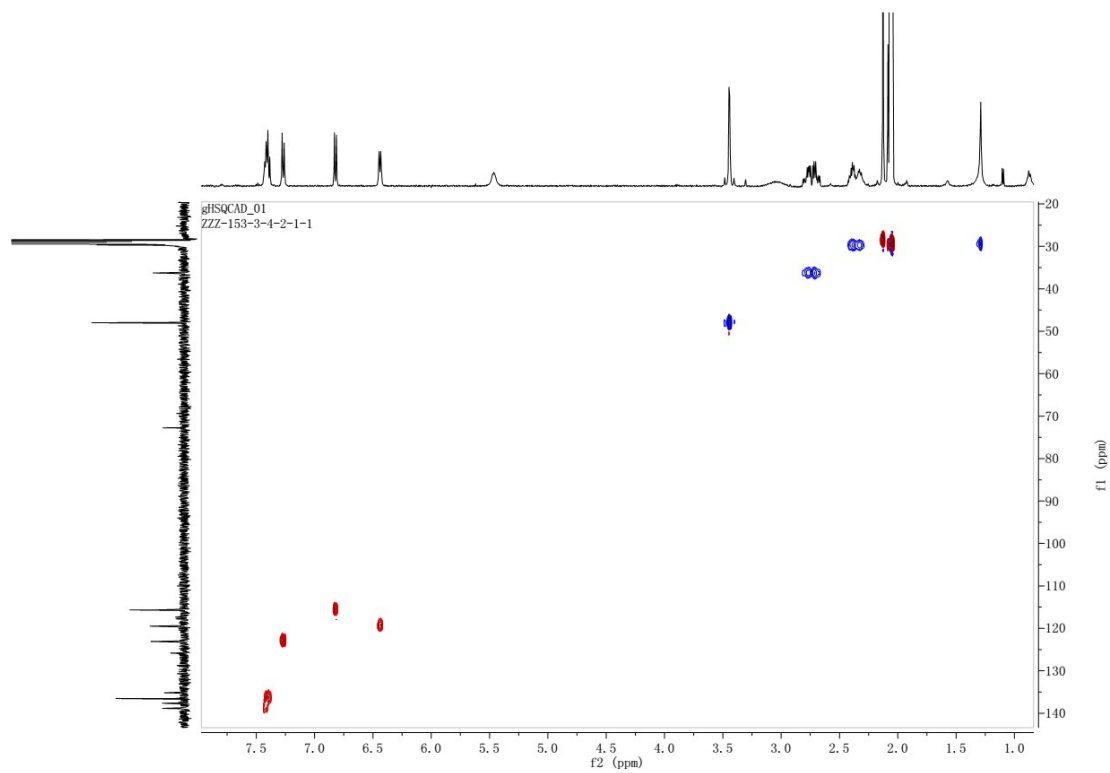

**Figure S5.**  $^1\text{H}$ - $^1\text{H}$  COSY spectrum of **1** in acetone- $d_6$ .

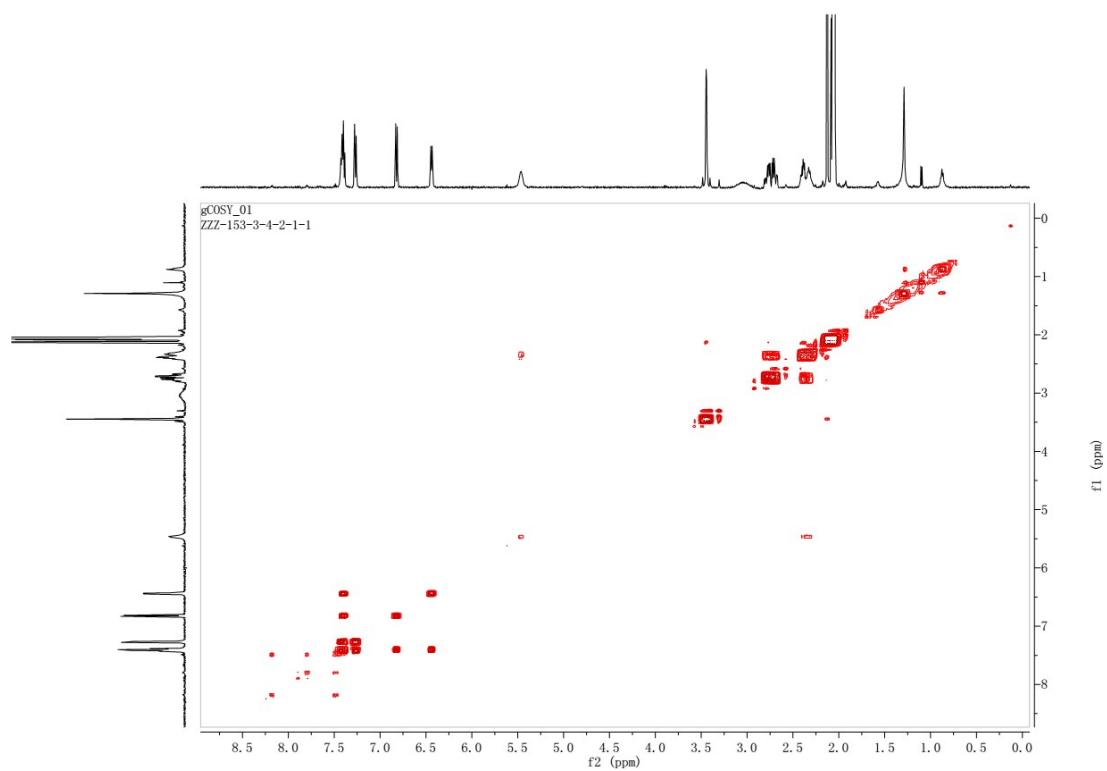

**Figure S6.** HMBC spectrum of **1** in acetone- $d_6$ .

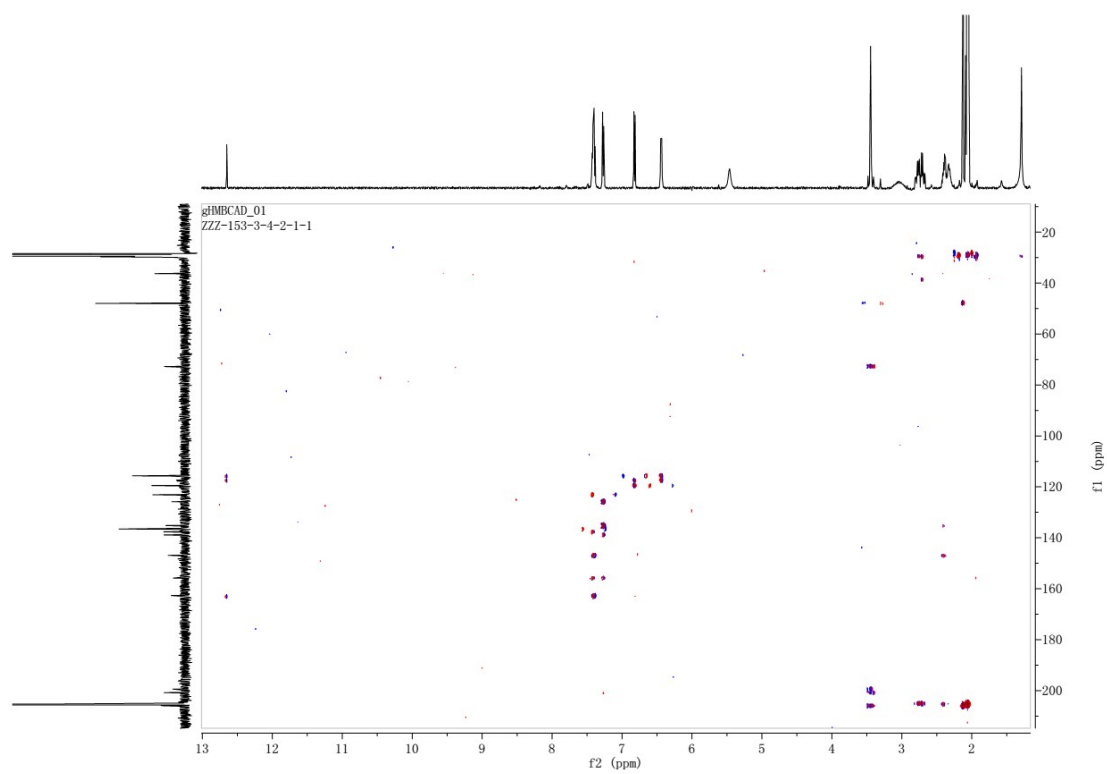

Figure S7. HRESIMS spectrum of 1.

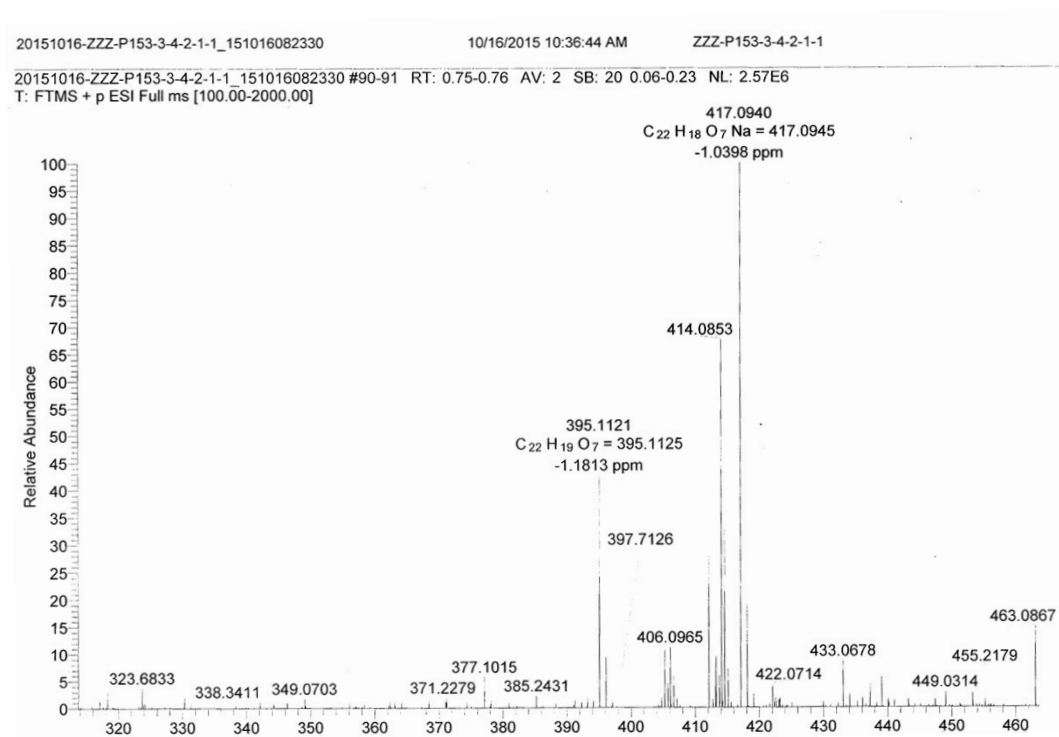

Figure S8. <sup>1</sup>H NMR (500 MHz, acetone-d<sub>6</sub>) spectrum of 2.

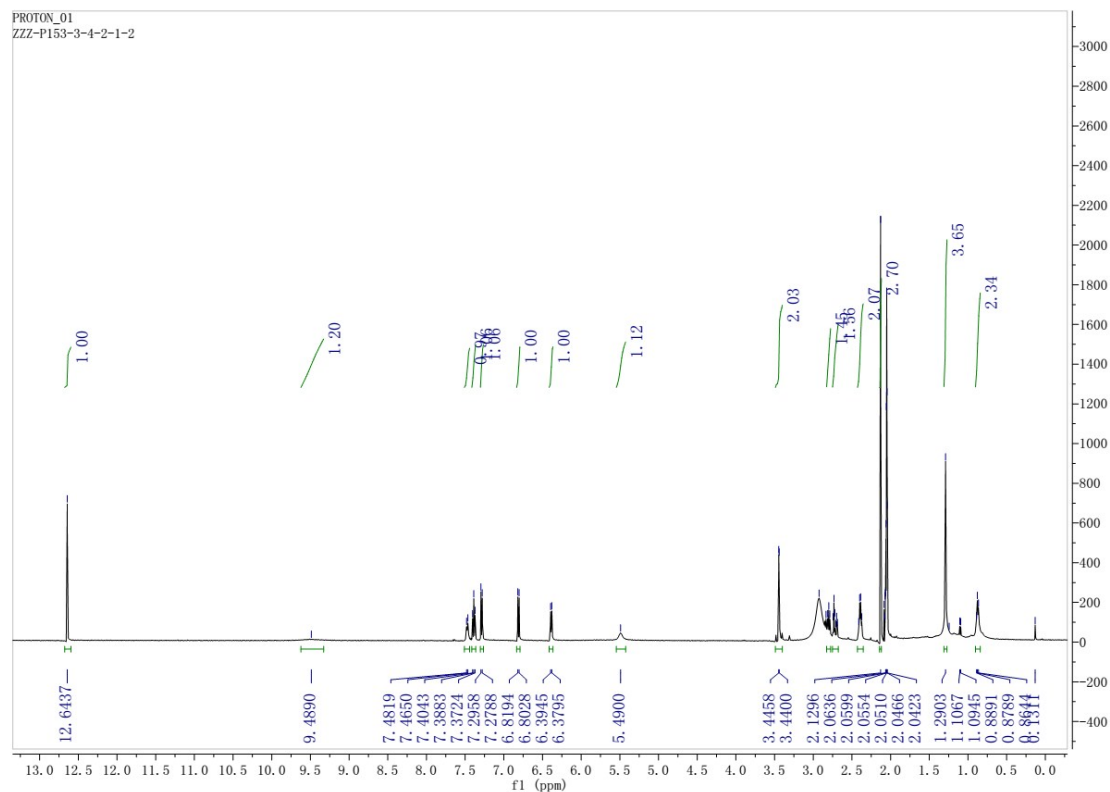

**Figure S9.**  $^{13}\text{C}$  NMR (125 MHz, acetone- $d_6$ ) spectrum of **2**.

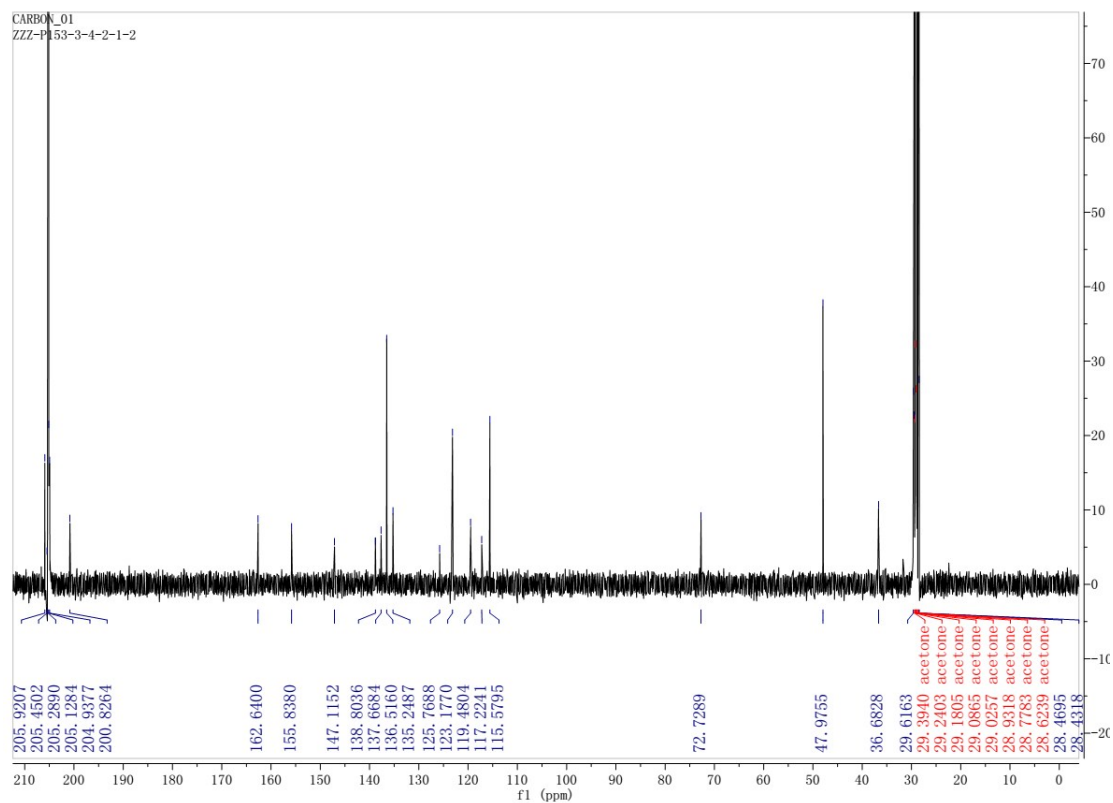

**Figure S10.** DEPT (125 MHz, acetone- $d_6$ ) spectrum of **2**.

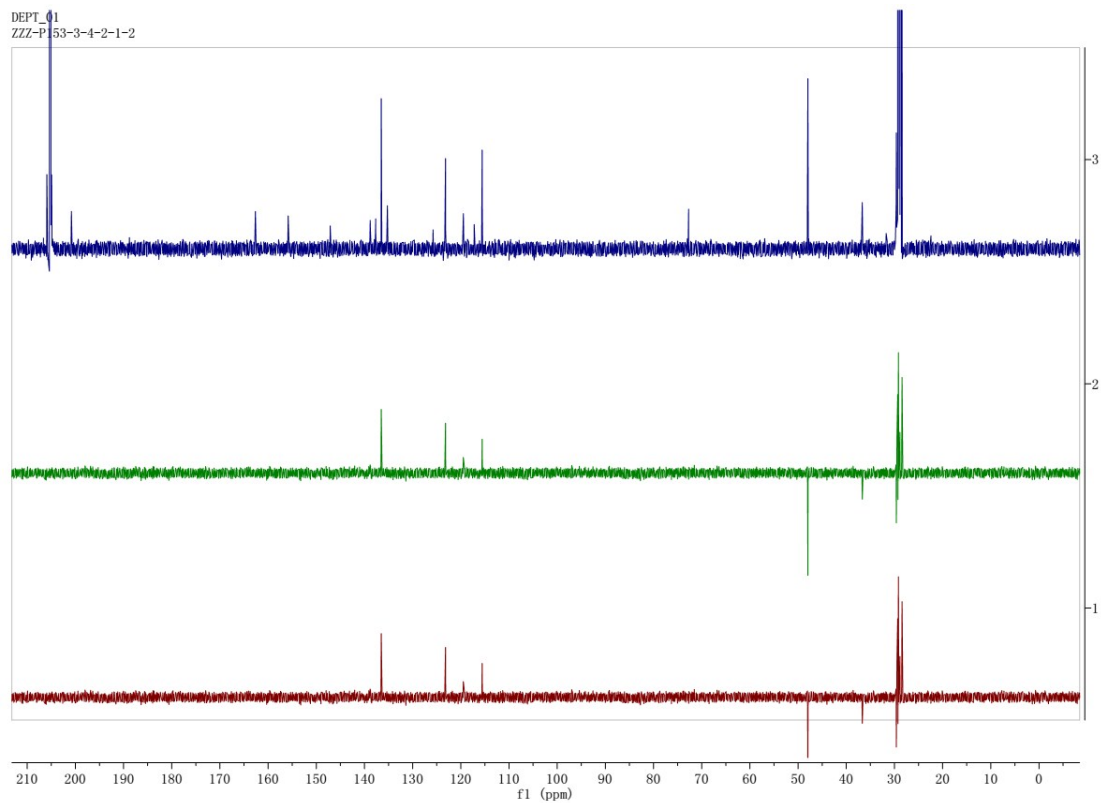



Figure S11. HSQC spectrum of **2** in acetone- $d_6$ .

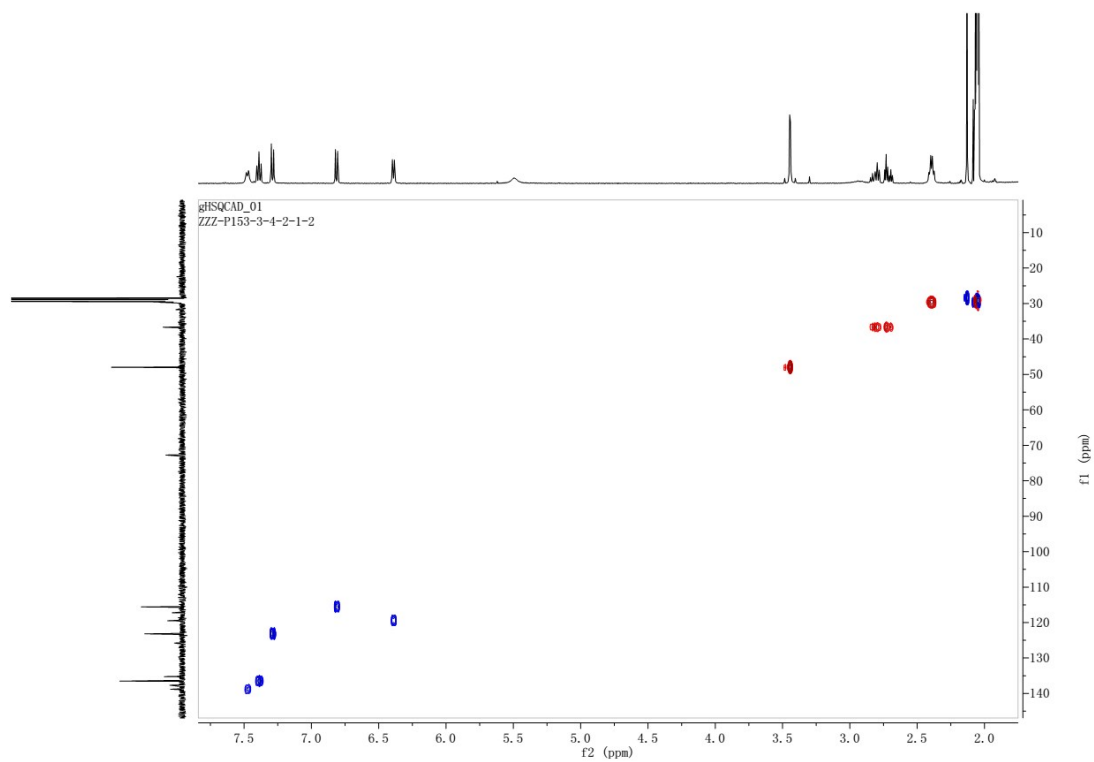

Figure S12.  $^1\text{H}$ - $^1\text{H}$  COSY spectrum of **2** in acetone- $d_6$ .

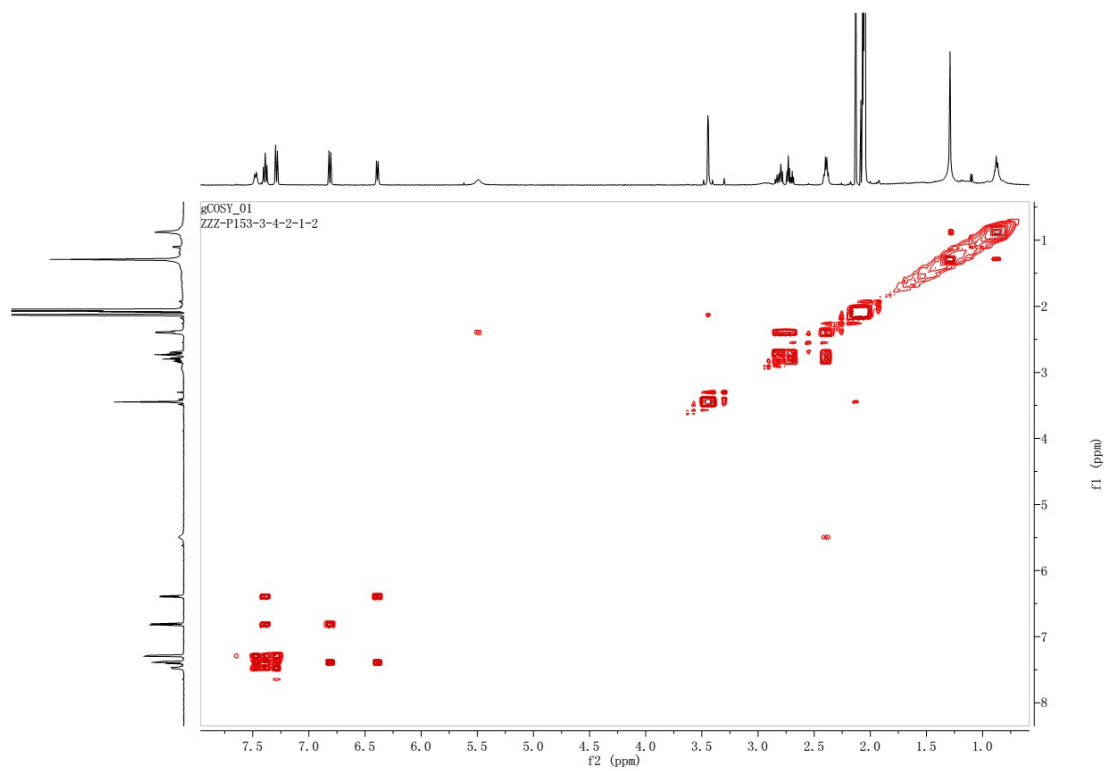

Figure S13. HMBC spectrum of **2** in acetone- $d_6$ .

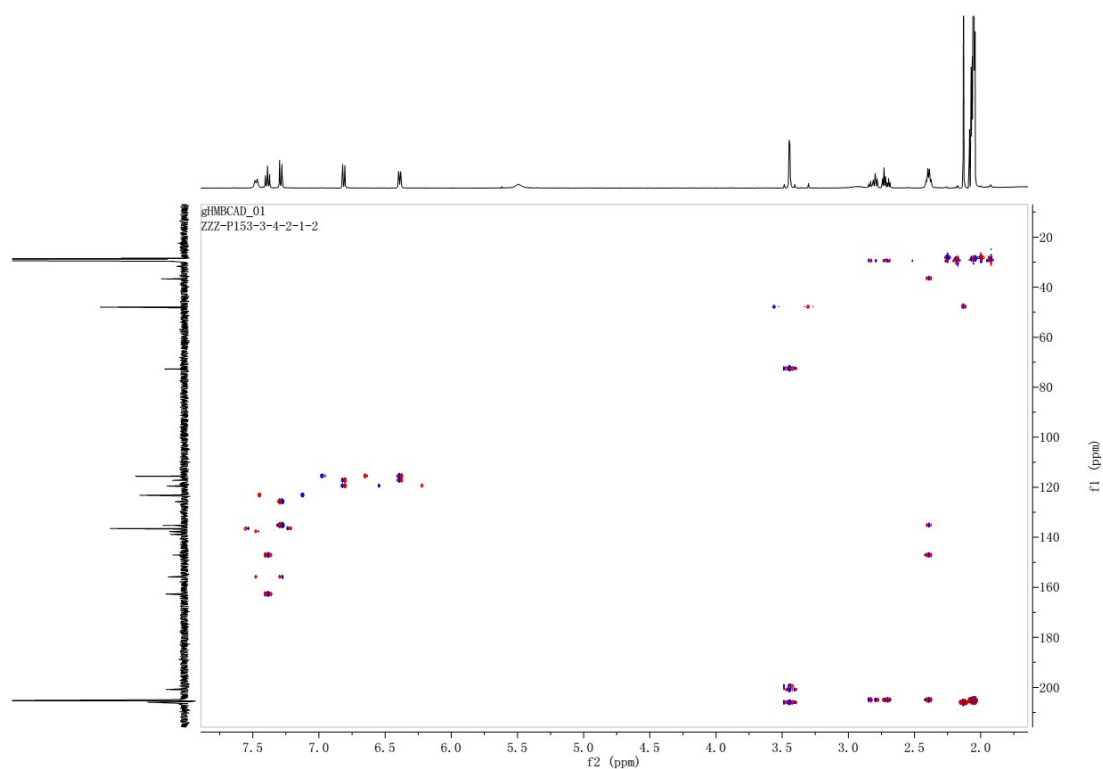

Figure S14. HRESIMS spectrum of **2**.

20151016-ZZZ-P153-3-4-2-1-2\_151016082330

10/16/2015 10:38:43 AM

ZZZ-P153-3-4-2-1-2

20151016-ZZZ-P153-3-4-2-1-2\_151016082330 #60-62 RT: 0.51-0.53 AV: 3 SB: 32 0.00-0.27 NL: 7.07E5  
T: FTMS + p ESI Full ms [100.00-2000.00]

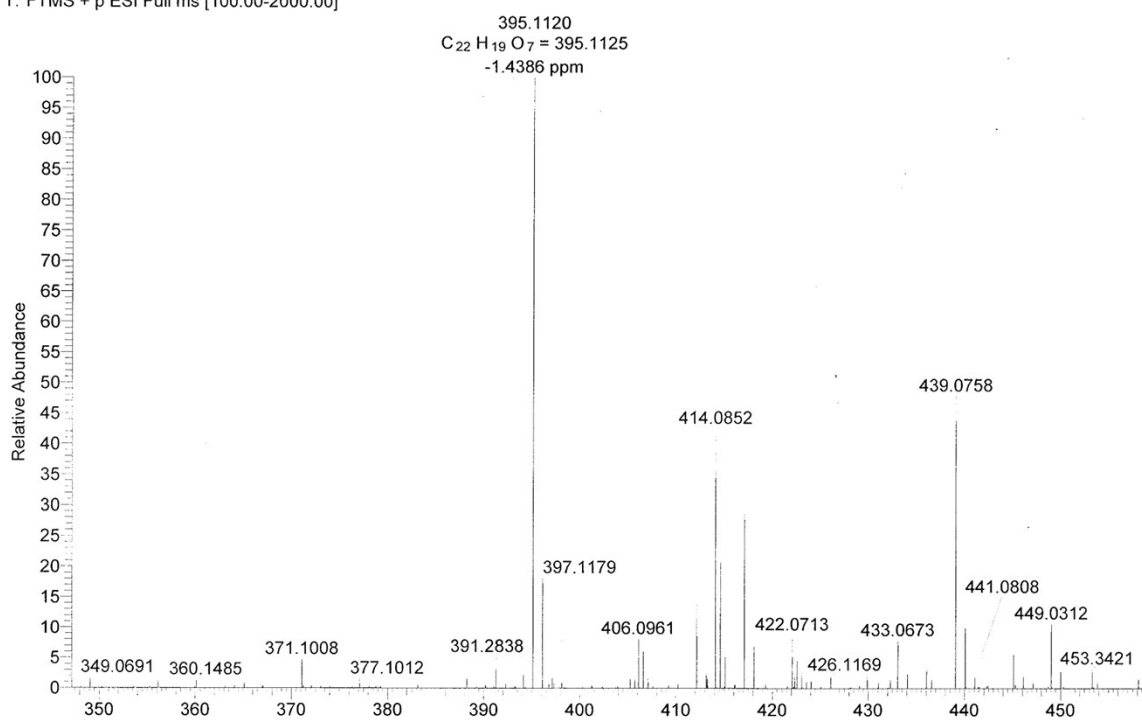

**Figure S15.**  $^1\text{H}$  NMR (500 MHz,  $\text{DMSO-}d_6$ ) spectrum of **3**.

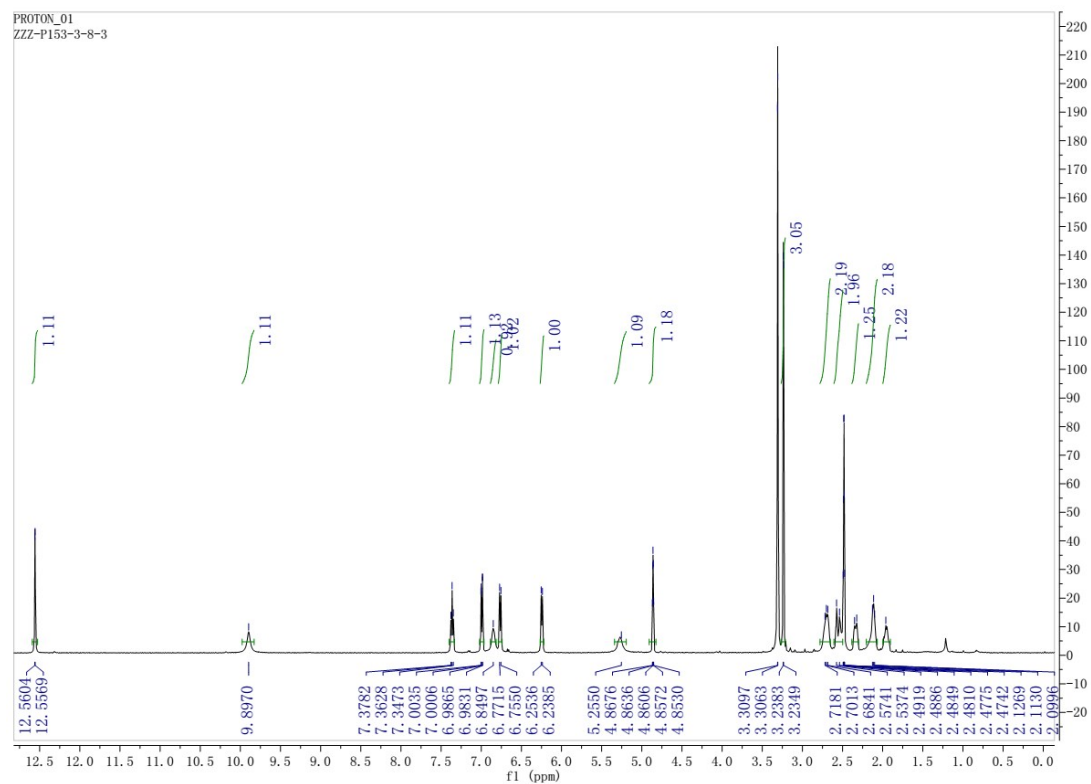

**Figure S16.**  $^{13}\text{C}$  NMR (125 MHz,  $\text{DMSO-}d_6$ ) spectrum of **3**.

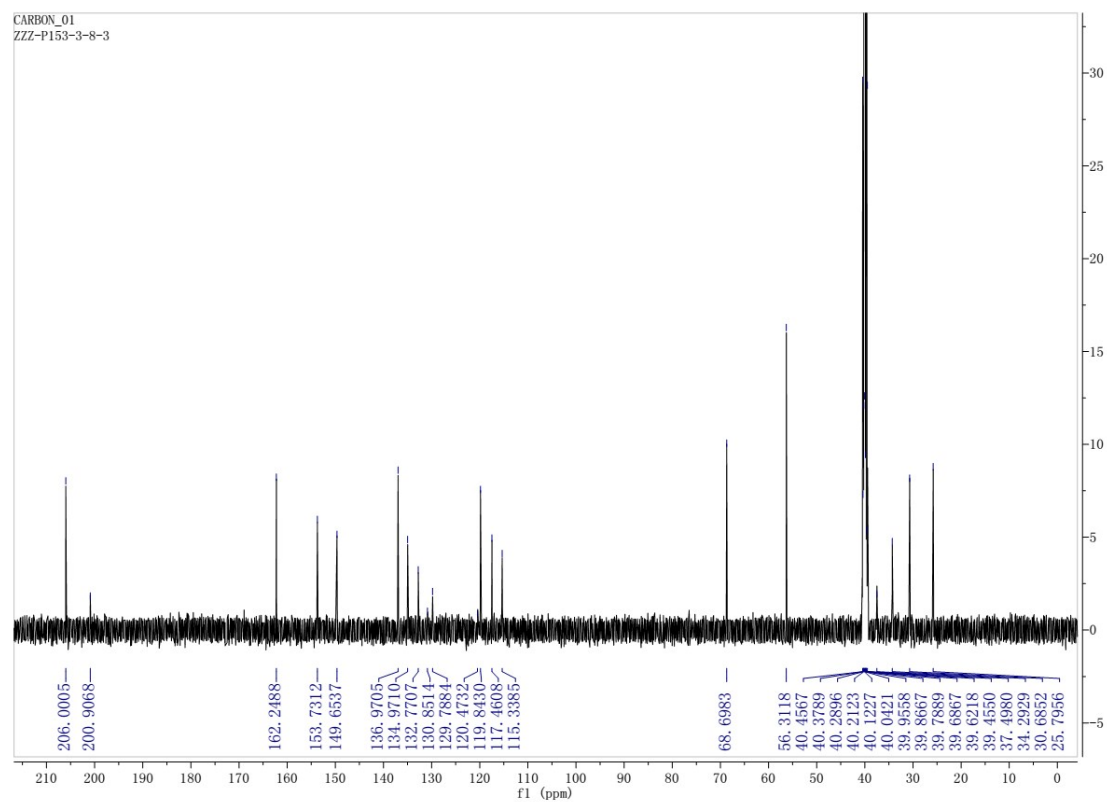

**Figure S17.** DEPT (125 MHz, DMSO- $d_6$ ) spectrum of **3**.

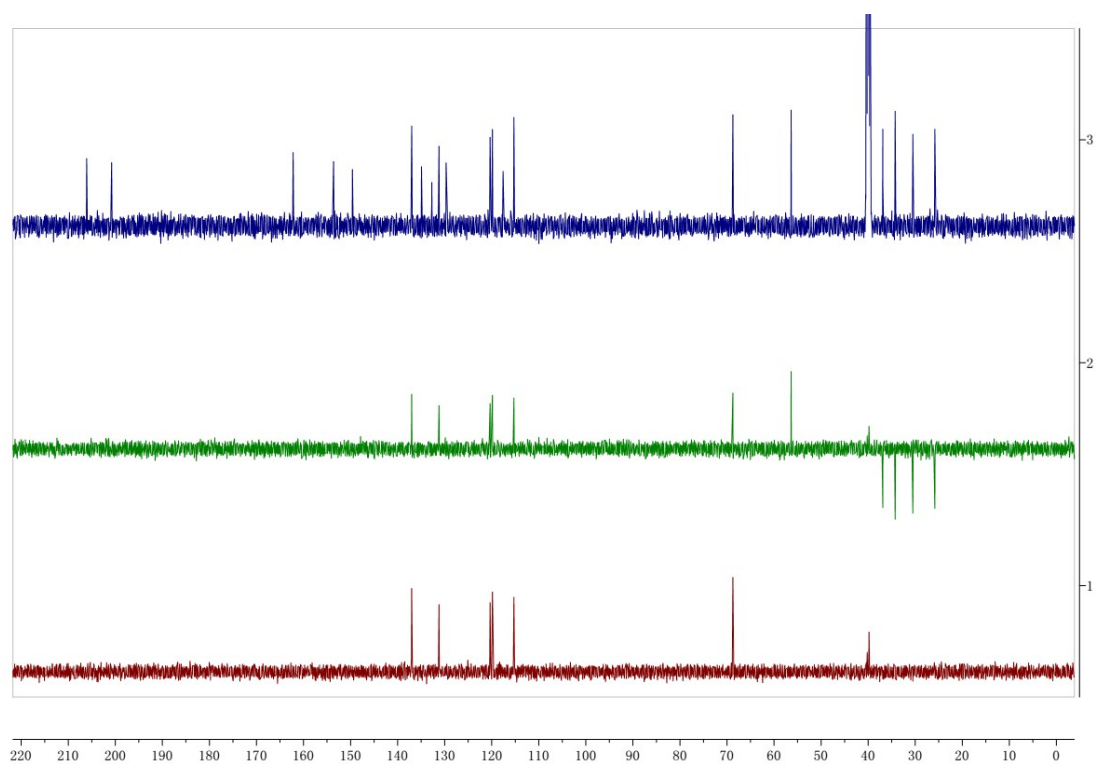

**Figure S18.** HSQC spectrum of **3** in DMSO- $d_6$ .

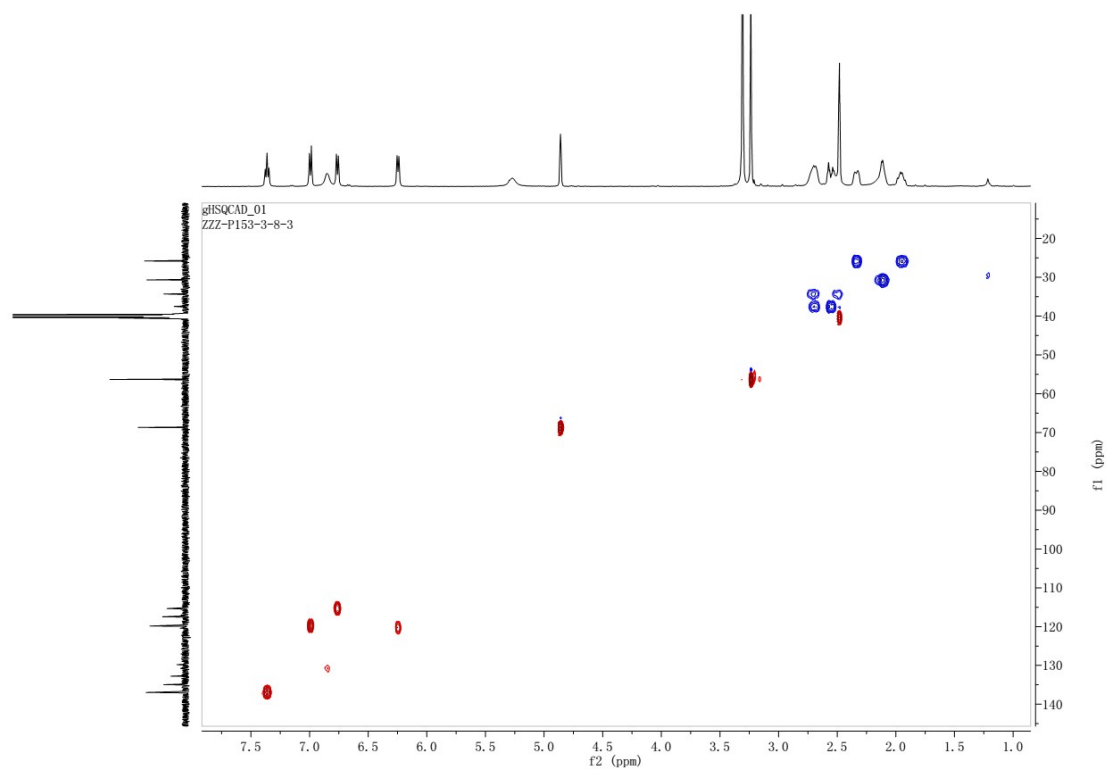

**Figure S19.**  $^1\text{H}$ - $^1\text{H}$  COSY spectrum of **3** in  $\text{DMSO-}d_6$ .

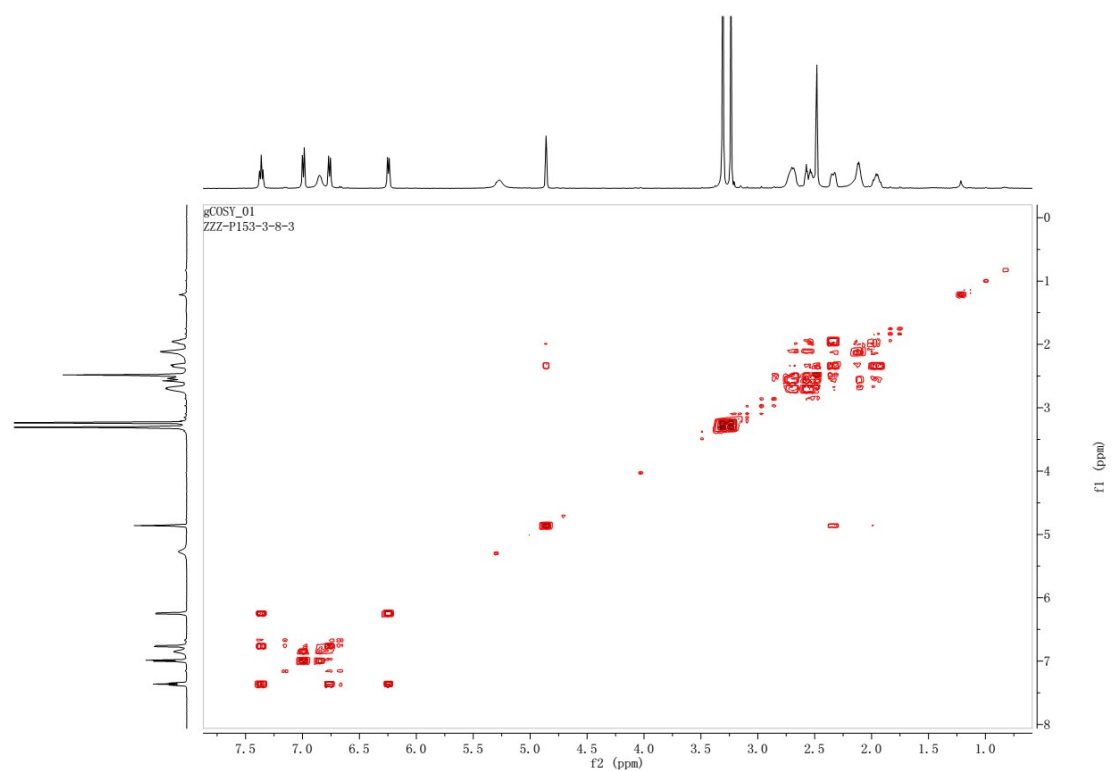

**Figure S20.** HMBC spectrum of **3** in  $\text{DMSO-}d_6$ .

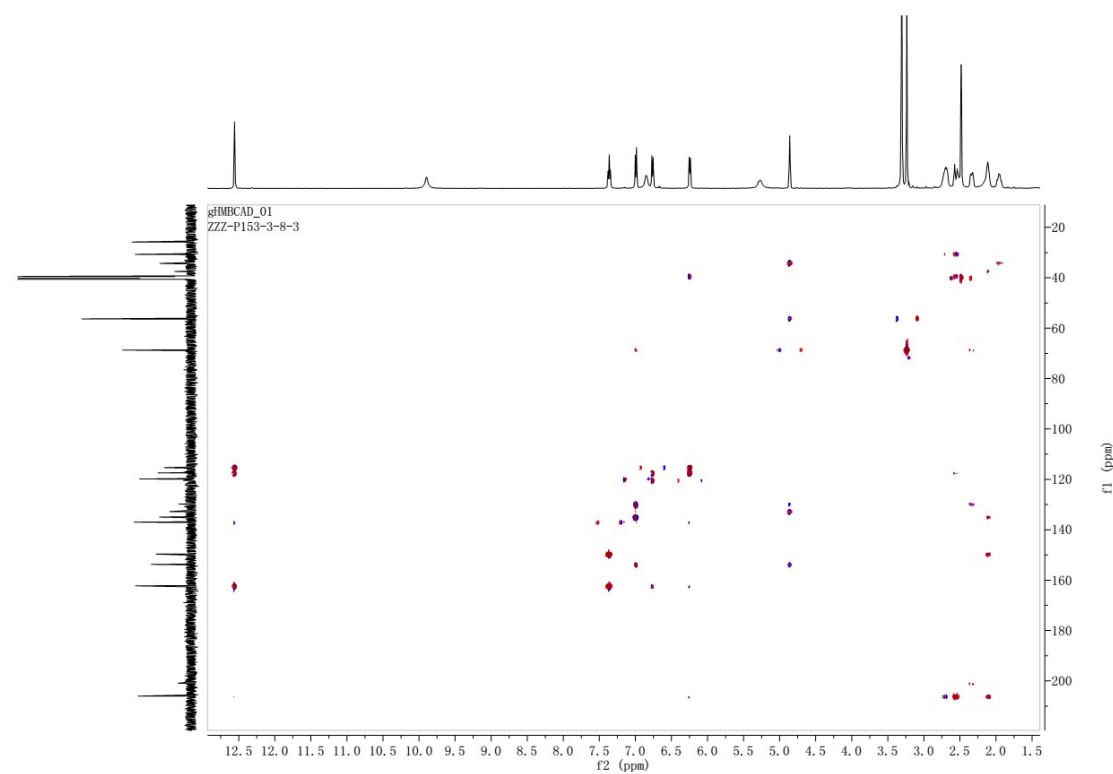

**Figure S21.** HRESIMS spectrum of **3**.

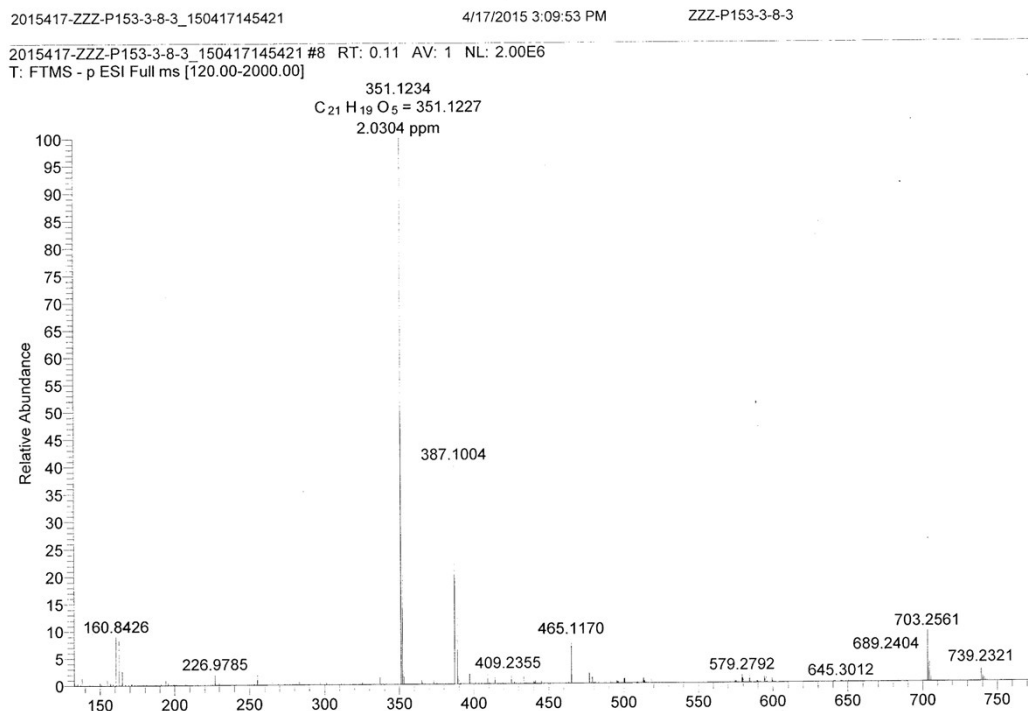

**Figure S22.** <sup>1</sup>H NMR (500 MHz, CD<sub>3</sub>OD) spectrum of **4**.

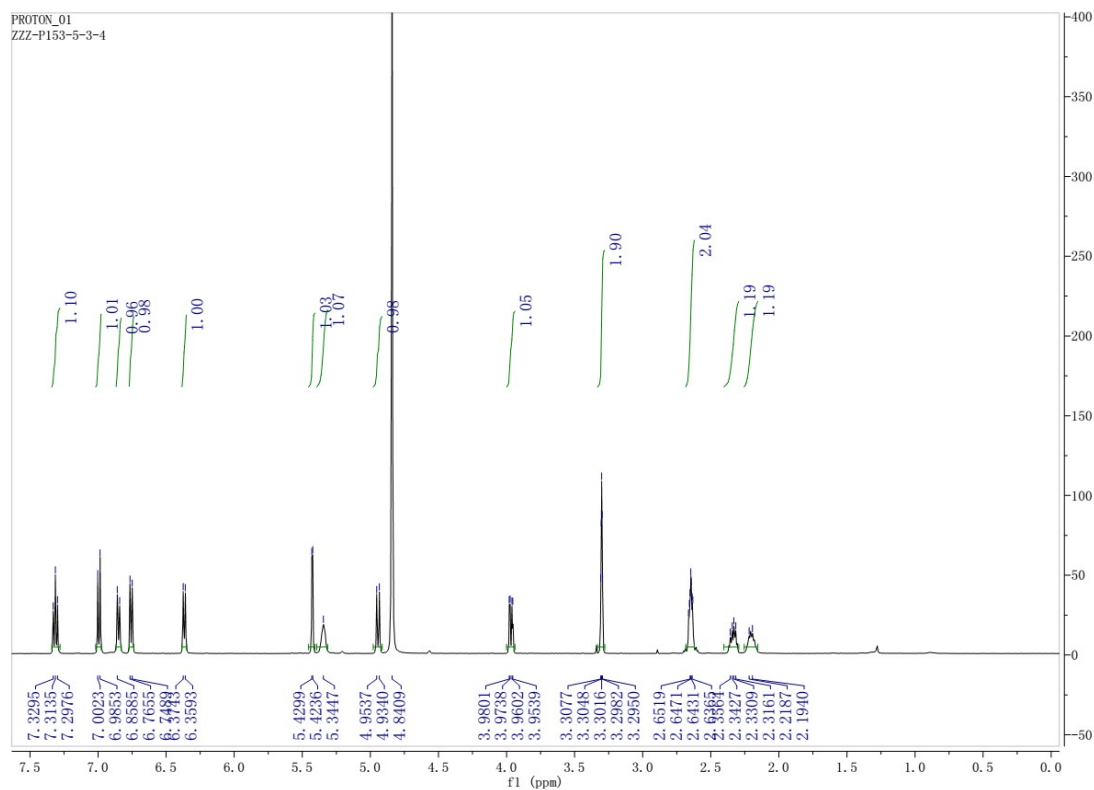

**Figure S23.**  $^{13}\text{C}$  NMR (125 MHz,  $\text{CD}_3\text{OD}$ ) spectrum of **4**.

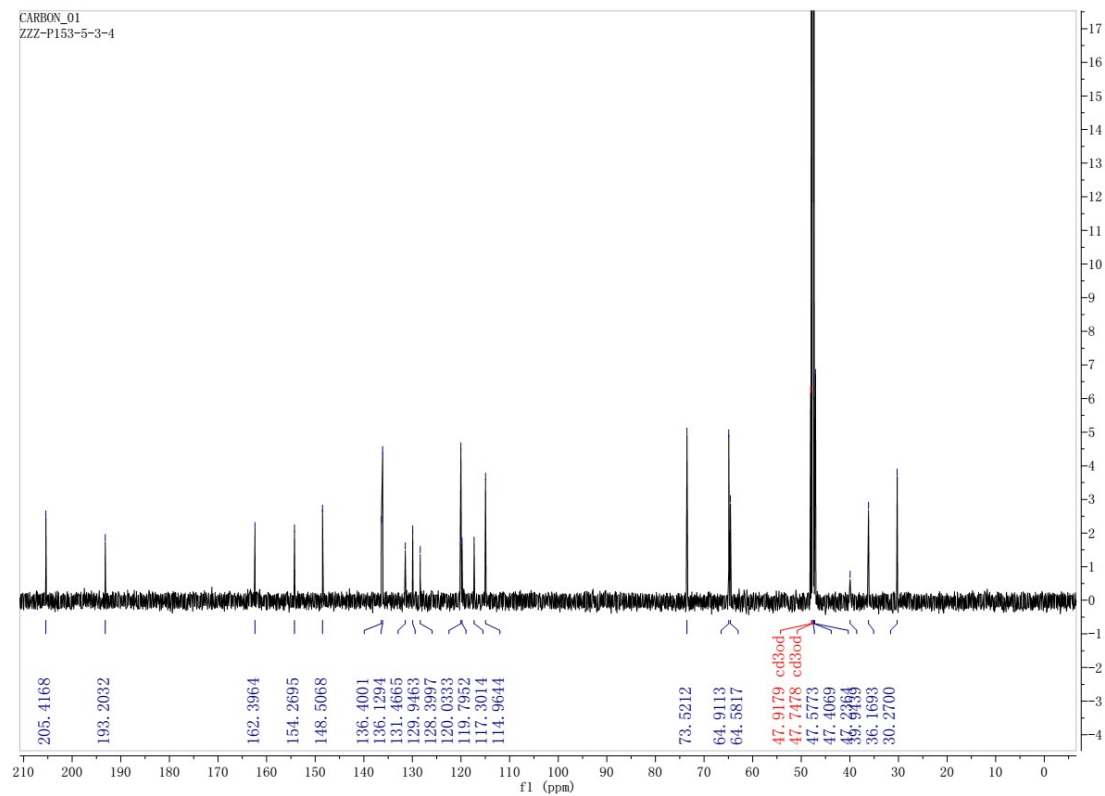

**Figure S24.** DEPT (125 MHz,  $\text{CD}_3\text{OD}$ ) spectrum of **4**.

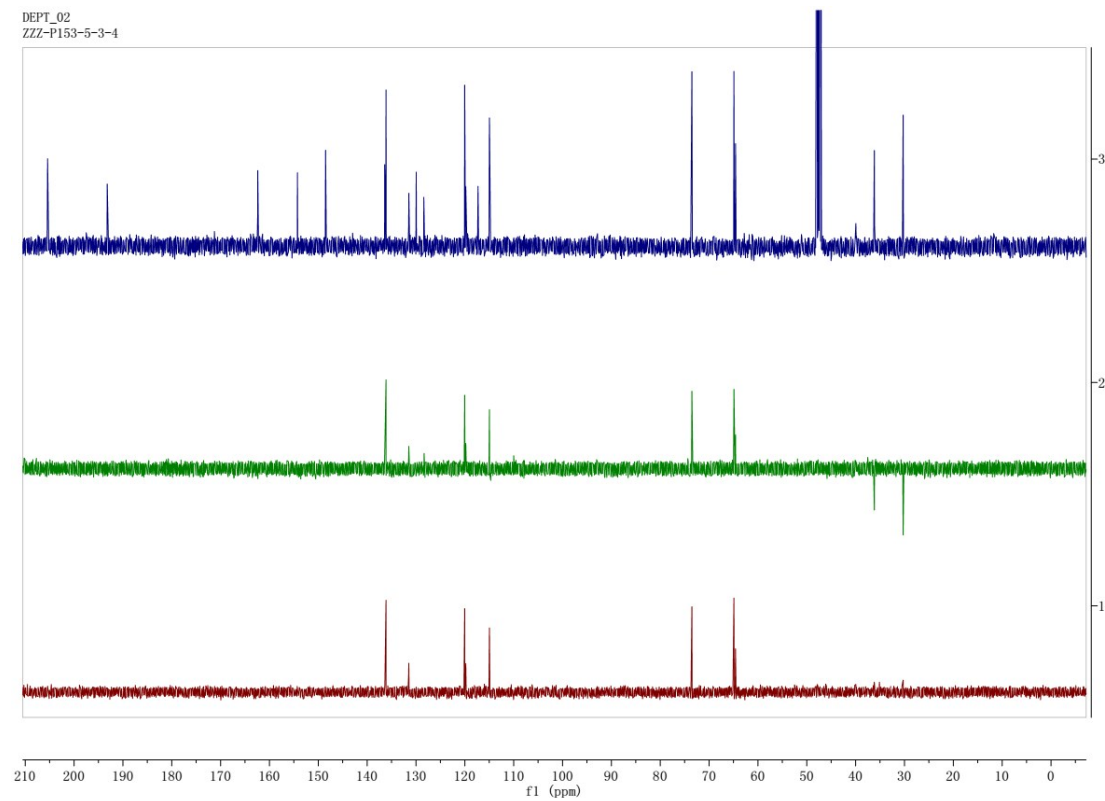

**Figure S25.** HSQC spectrum of **4** in CD<sub>3</sub>OD.

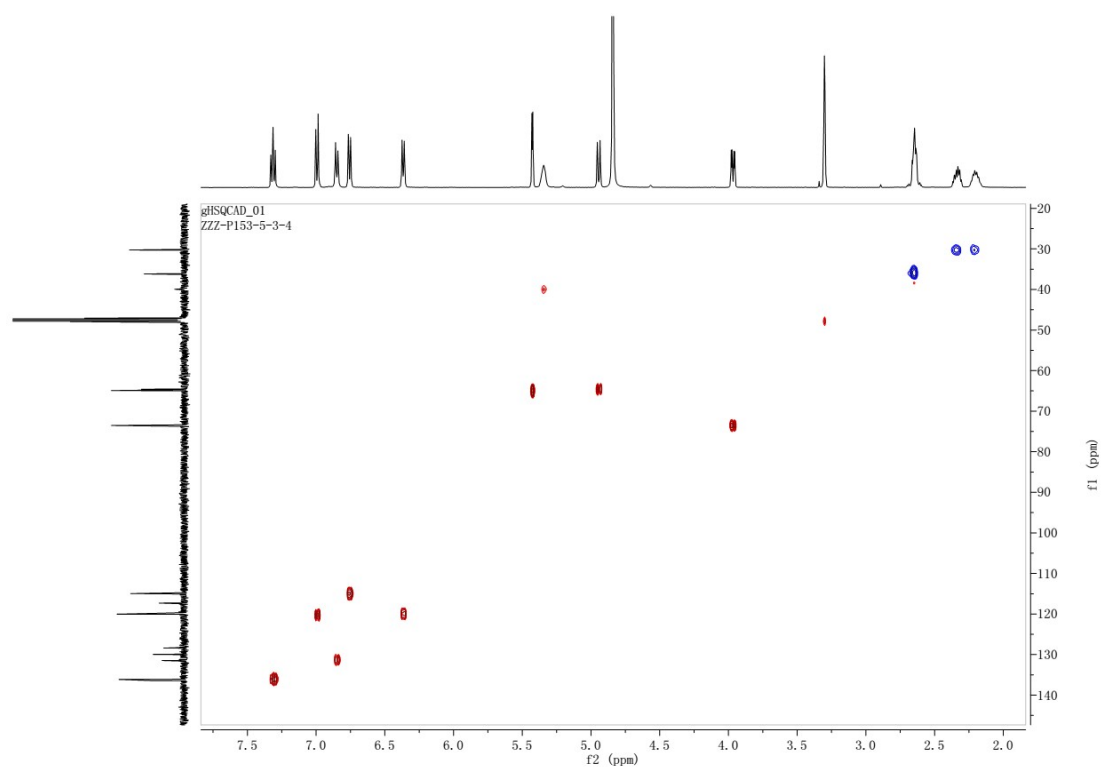

**Figure S26.** <sup>1</sup>H-<sup>1</sup>H COSY spectrum of **4** in CD<sub>3</sub>OD.

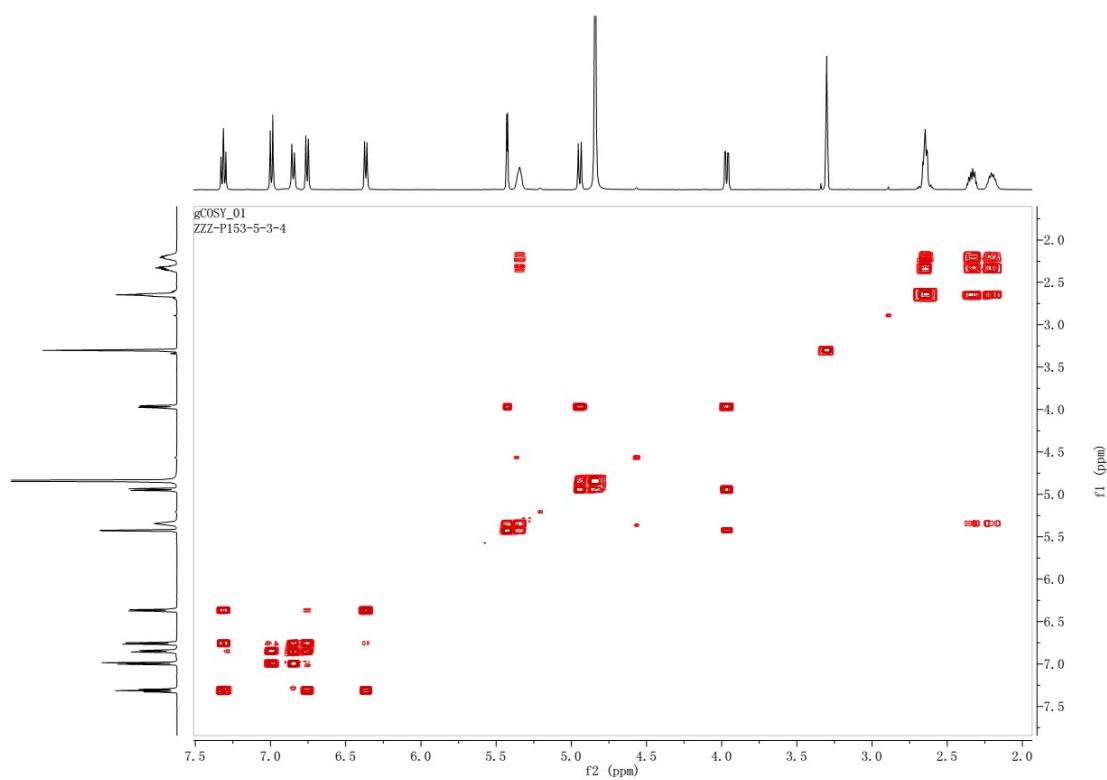



Figure S27. HMBC spectrum of 4 in CD<sub>3</sub>OD.

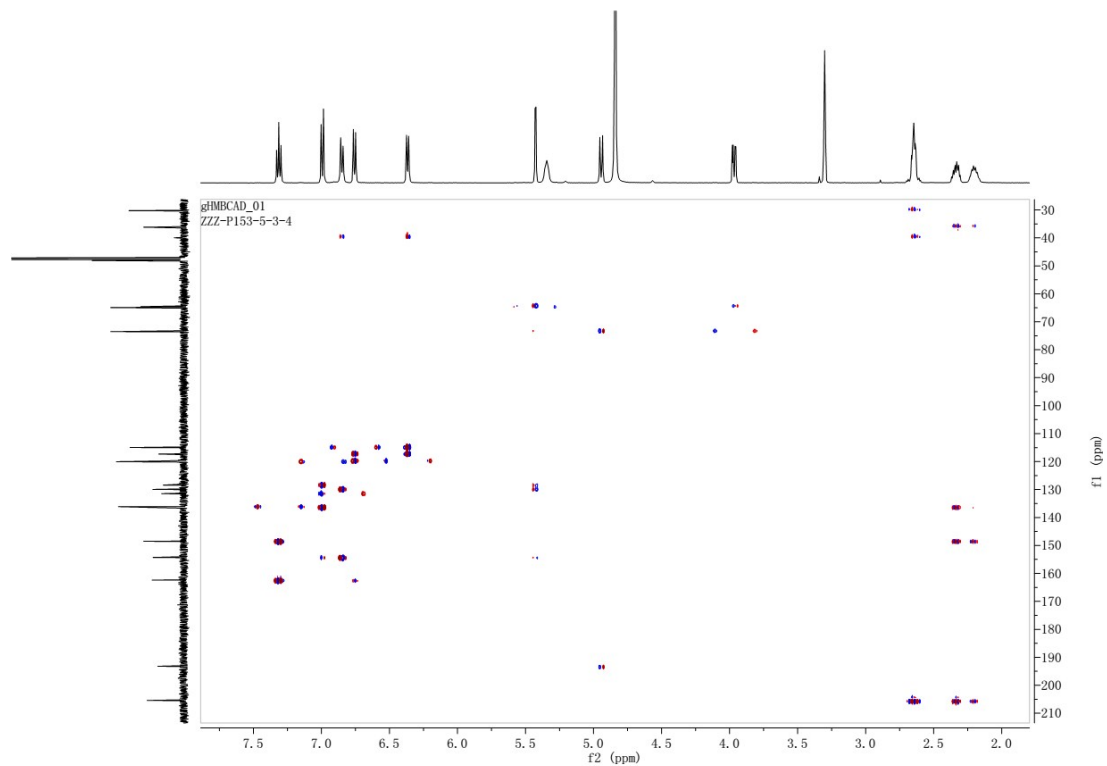

Figure S28. HRESIMS spectrum of 4.

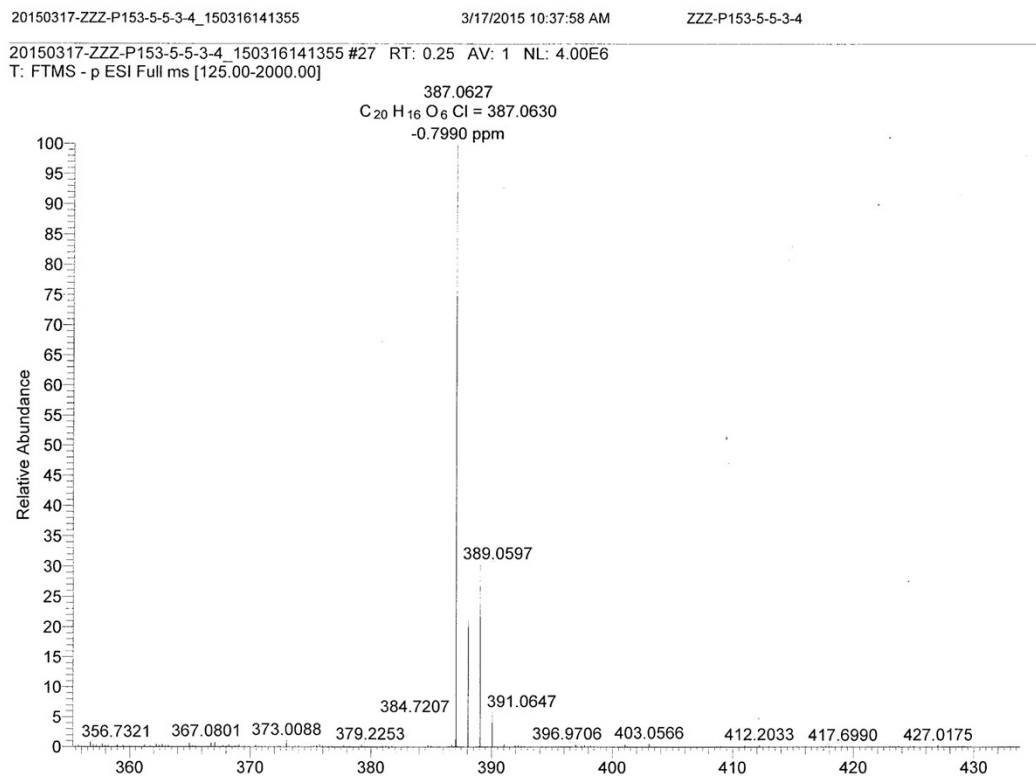

**Figure S29.**  $^1\text{H}$  NMR (500 MHz,  $\text{DMSO-}d_6$ ) spectrum of **4**.

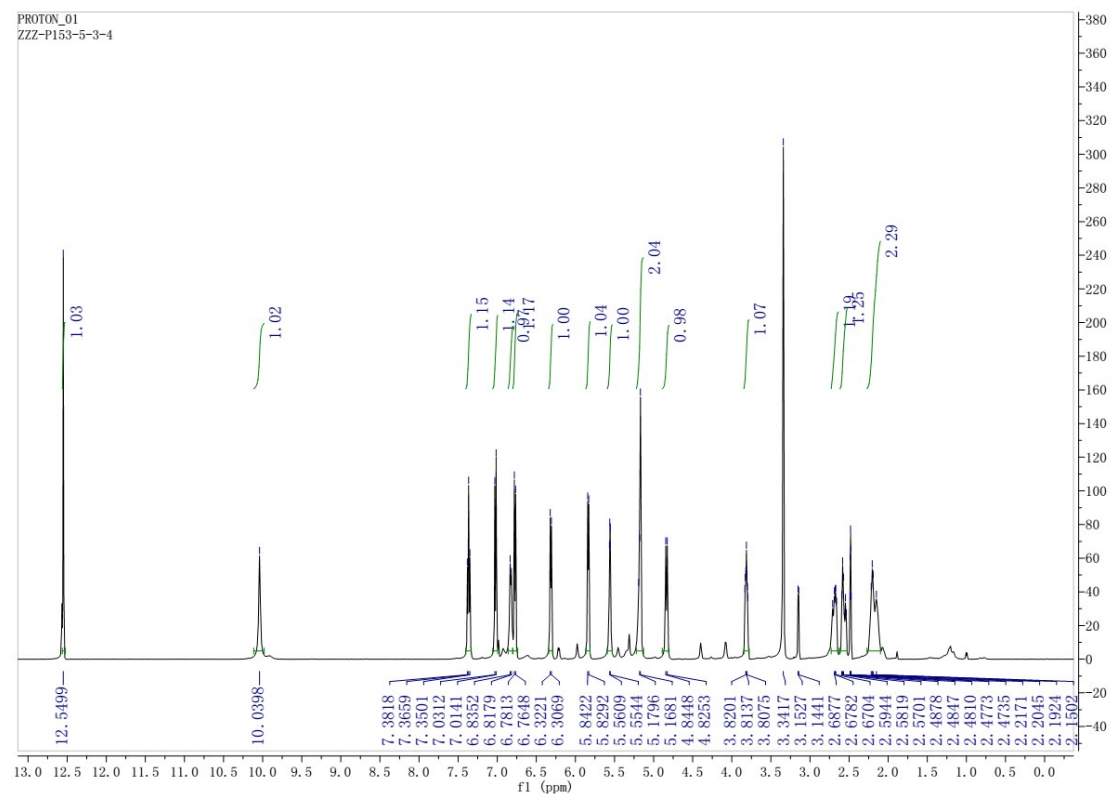

**Figure S30.**  $^{13}\text{C}$  NMR (125 MHz,  $\text{DMSO-}d_6$ ) spectrum of **4**.

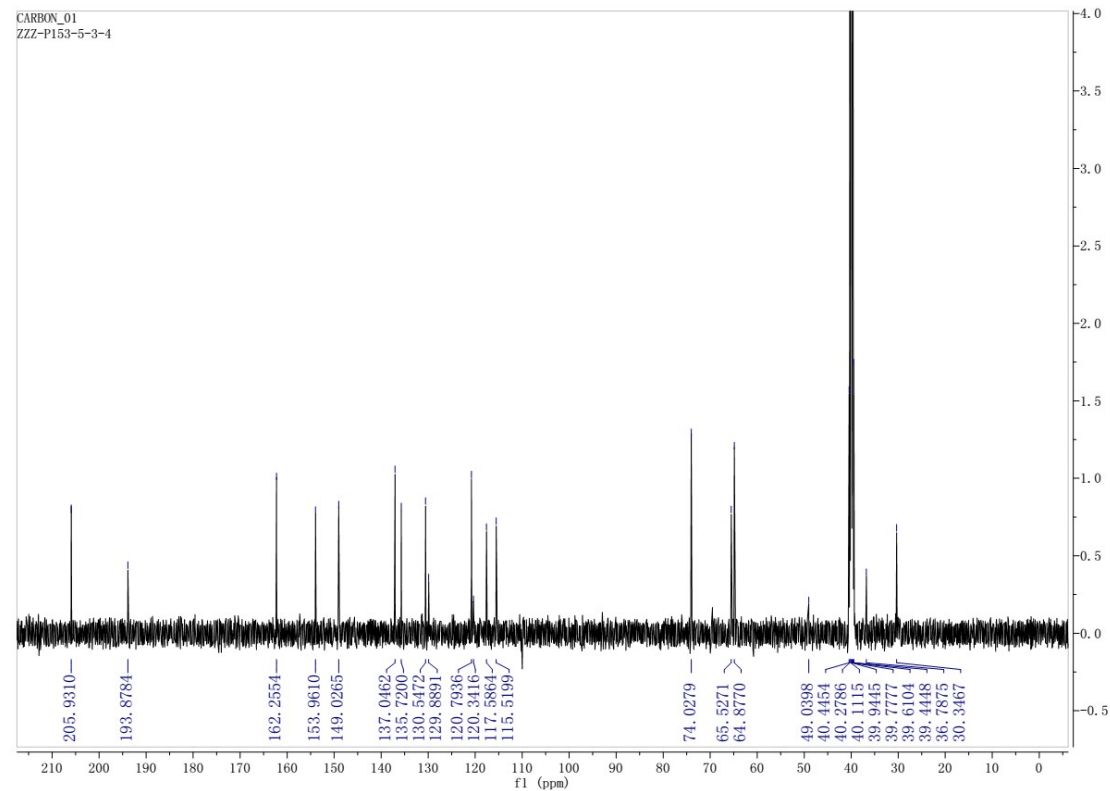

**Figure S31.** DEPT (125 MHz, DMSO- $d_6$ ) spectrum of **4**.

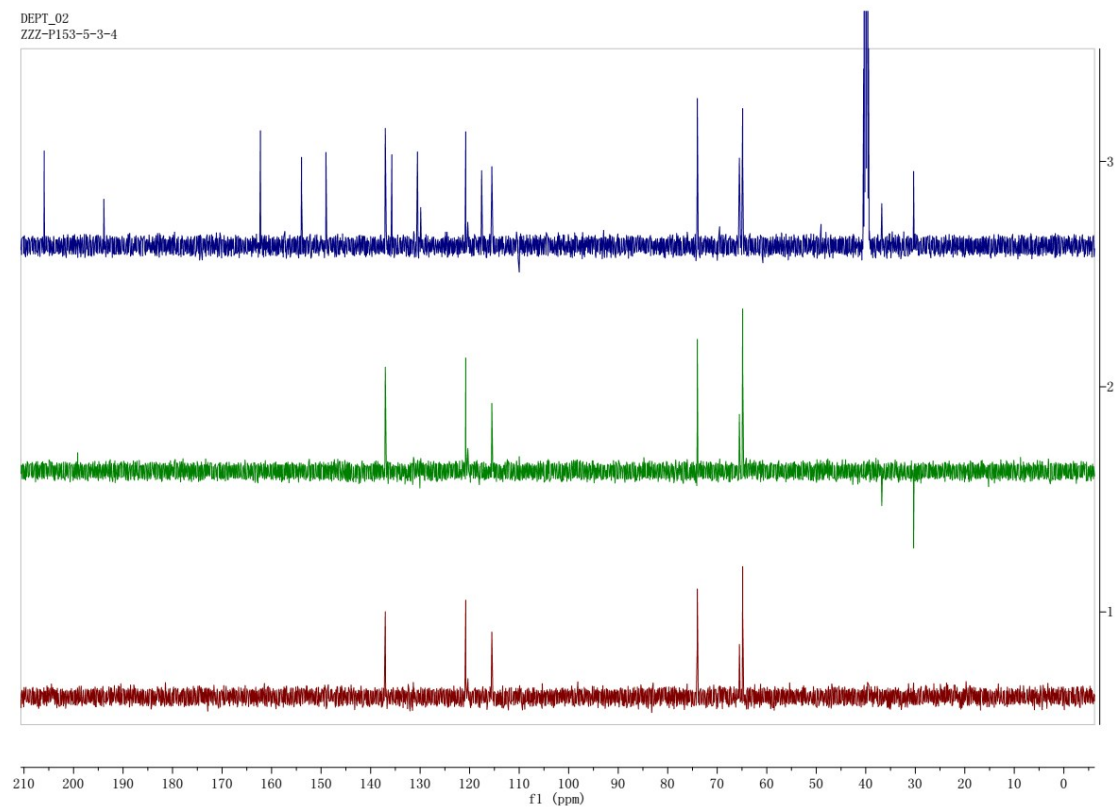

**Figure S32.** HSQC spectrum of **4** in DMSO- $d_6$ .

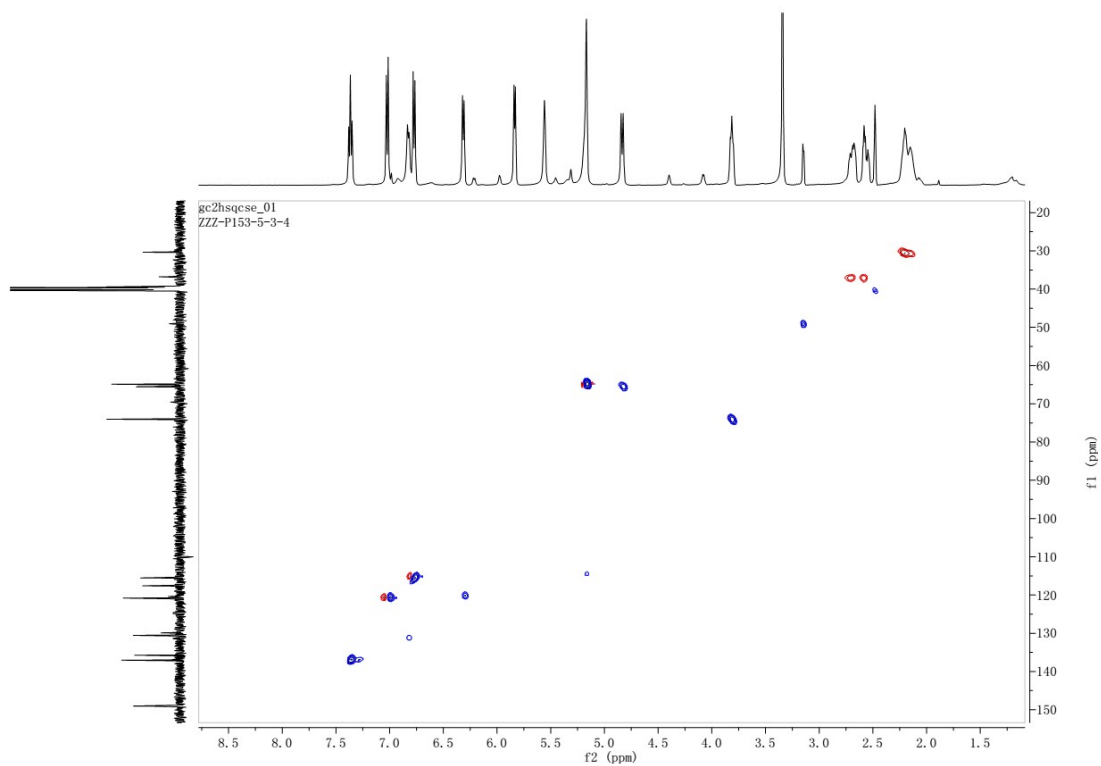

**Figure S33.**  $^1\text{H}$ - $^1\text{H}$  COSY spectrum of **4** in  $\text{DMSO-}d_6$ .

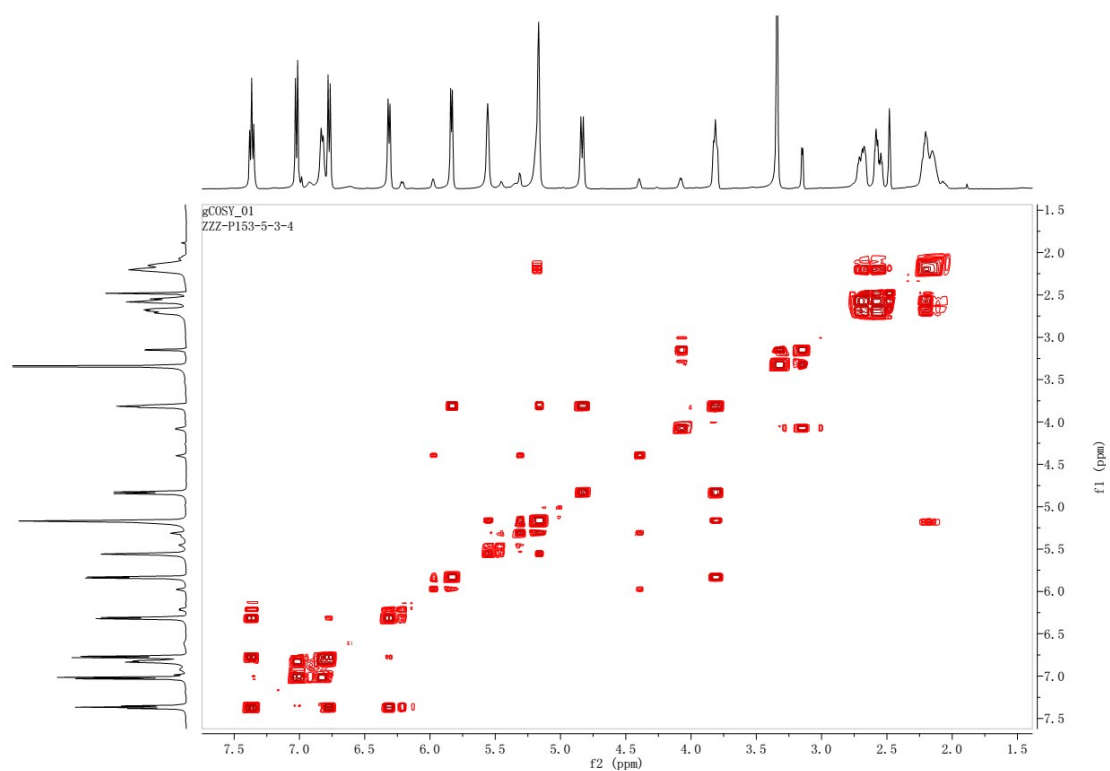

**Figure S34.** HMBC spectrum of **4** in  $\text{DMSO-}d_6$ .

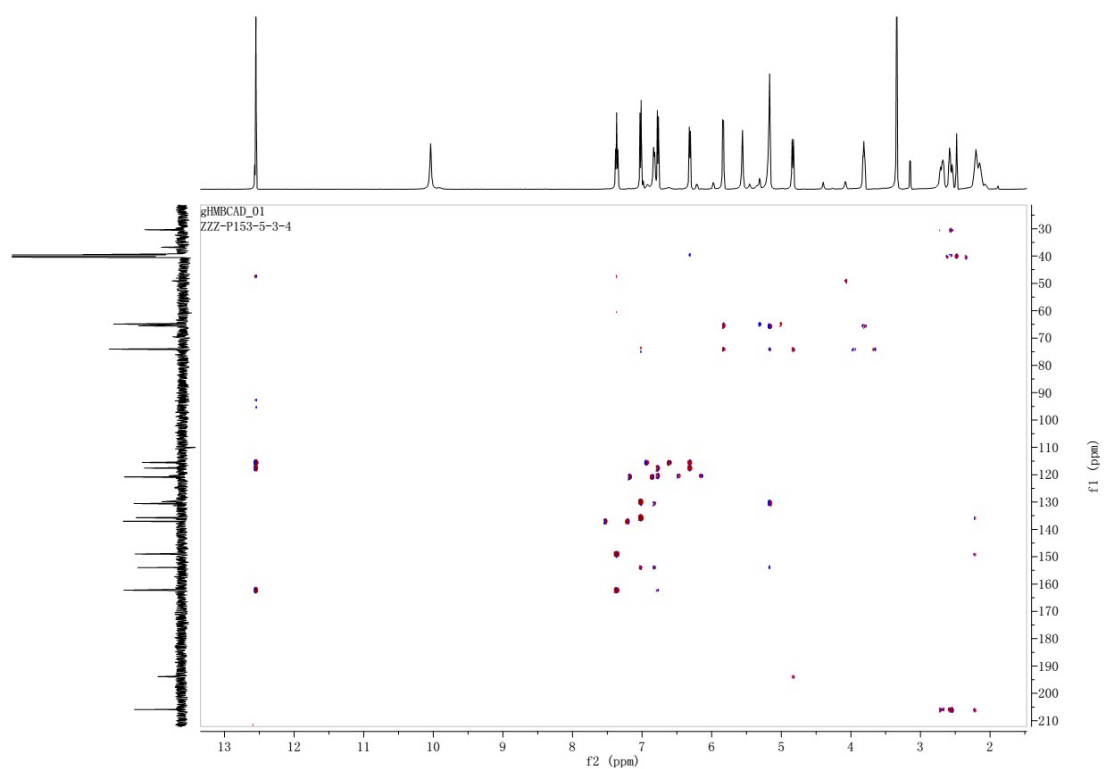

**Figure S35.**  $^1\text{H}$  NMR (500 MHz,  $\text{CDCl}_3$ ) spectrum of **5**.

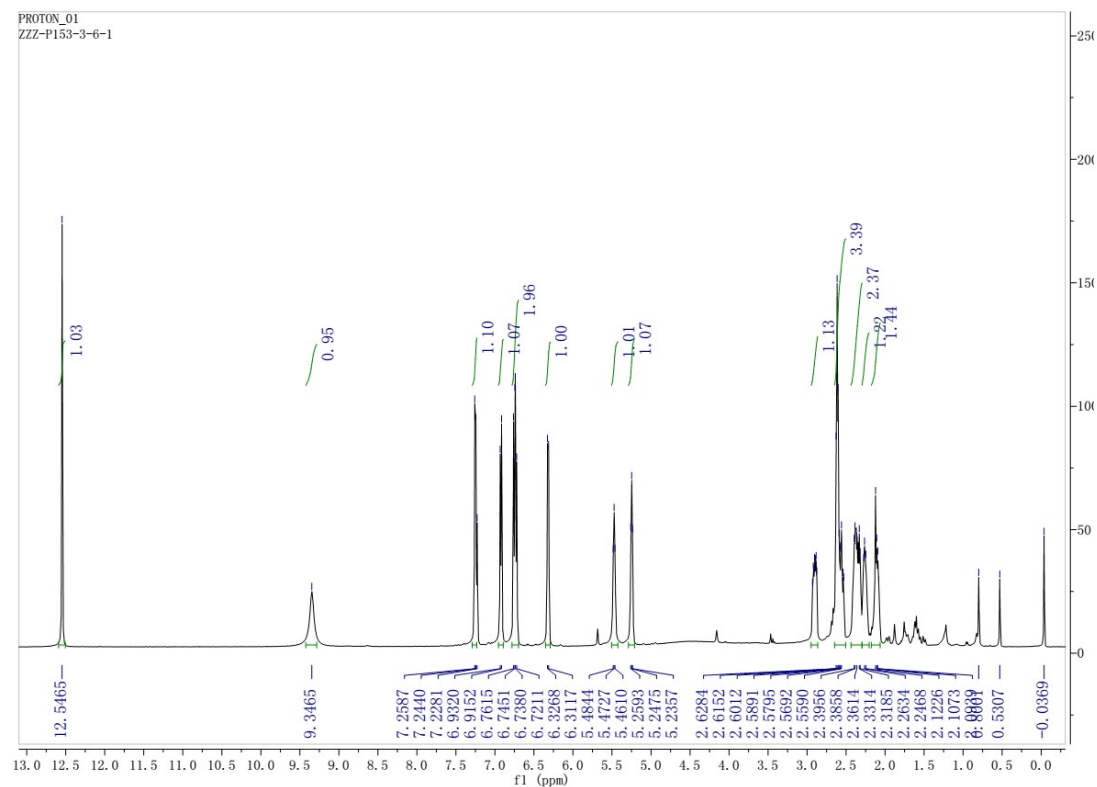

**Figure S36.**  $^{13}\text{C}$  NMR (125 MHz,  $\text{CDCl}_3$ ) spectrum of **5**.

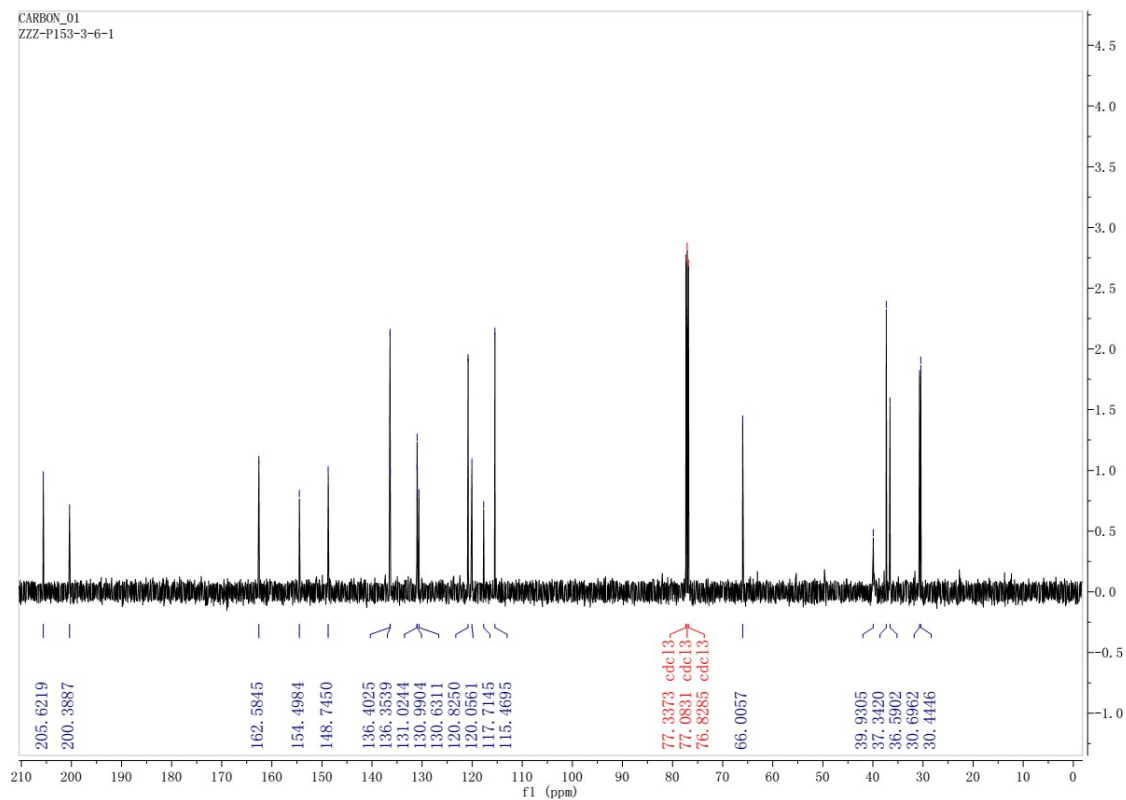

**Figure S37.** DEPT (125 MHz, CDCl<sub>3</sub>) spectrum of **5**.

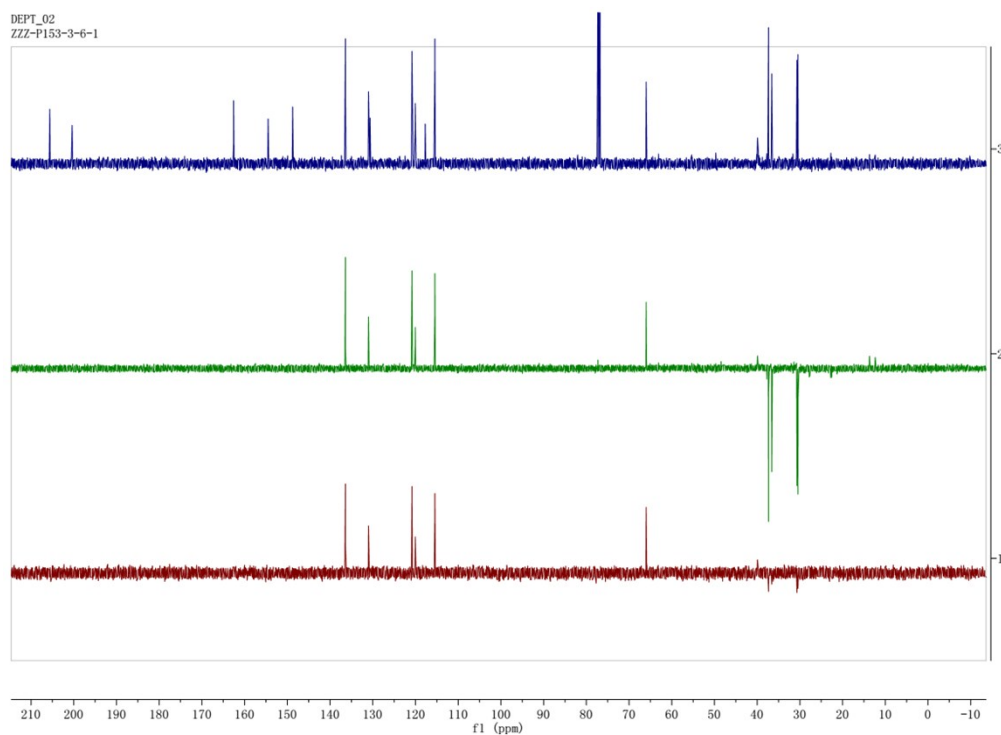

**Figure S38.** Major dimerized patterns of 1-tetralone dimers.

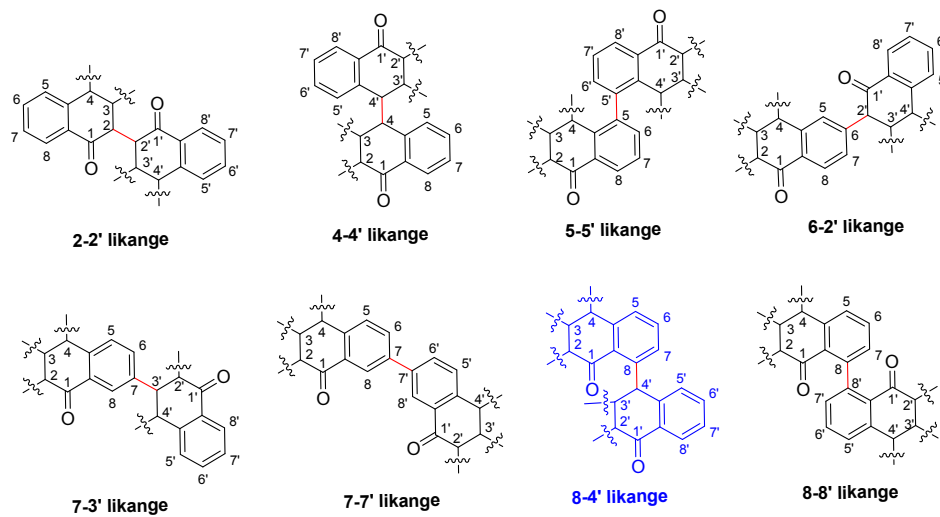

Figure S39. HPLC of HDN14-342 crude extract.

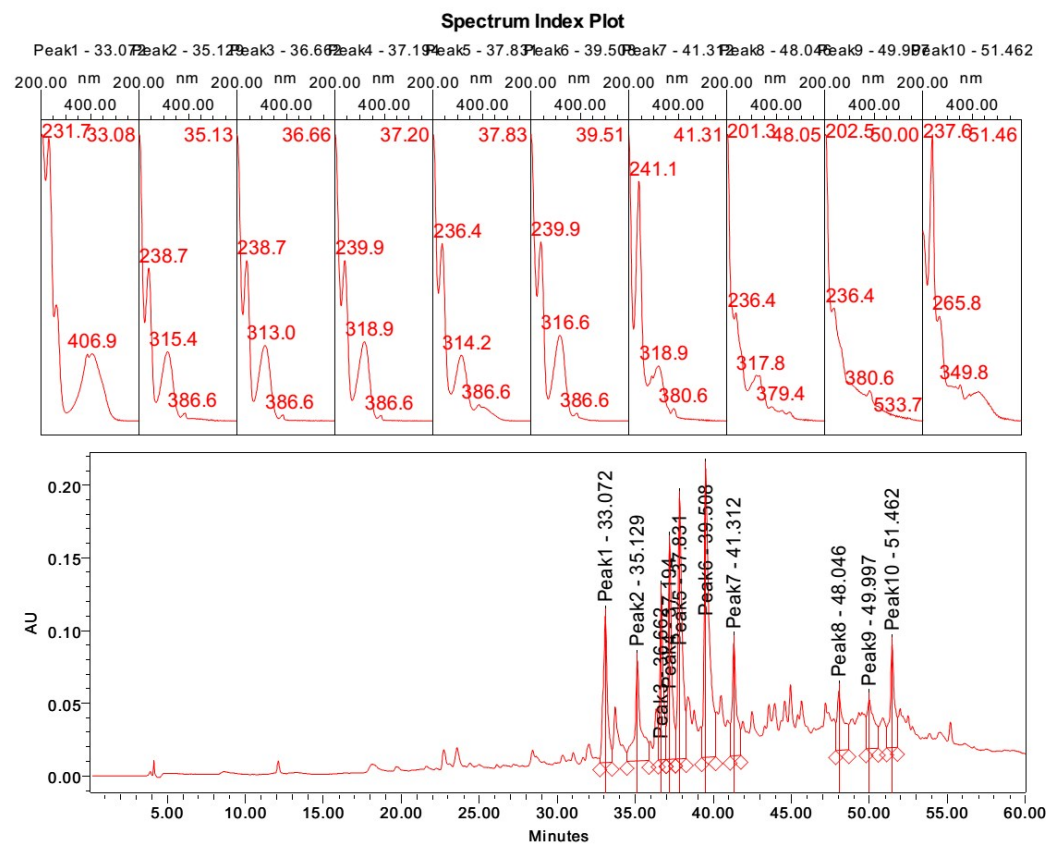

Figure S40. <sup>1</sup>H NMR (500 MHz, DMSO-*d*<sub>6</sub>) spectrum of the mixture of **1** and **2**.

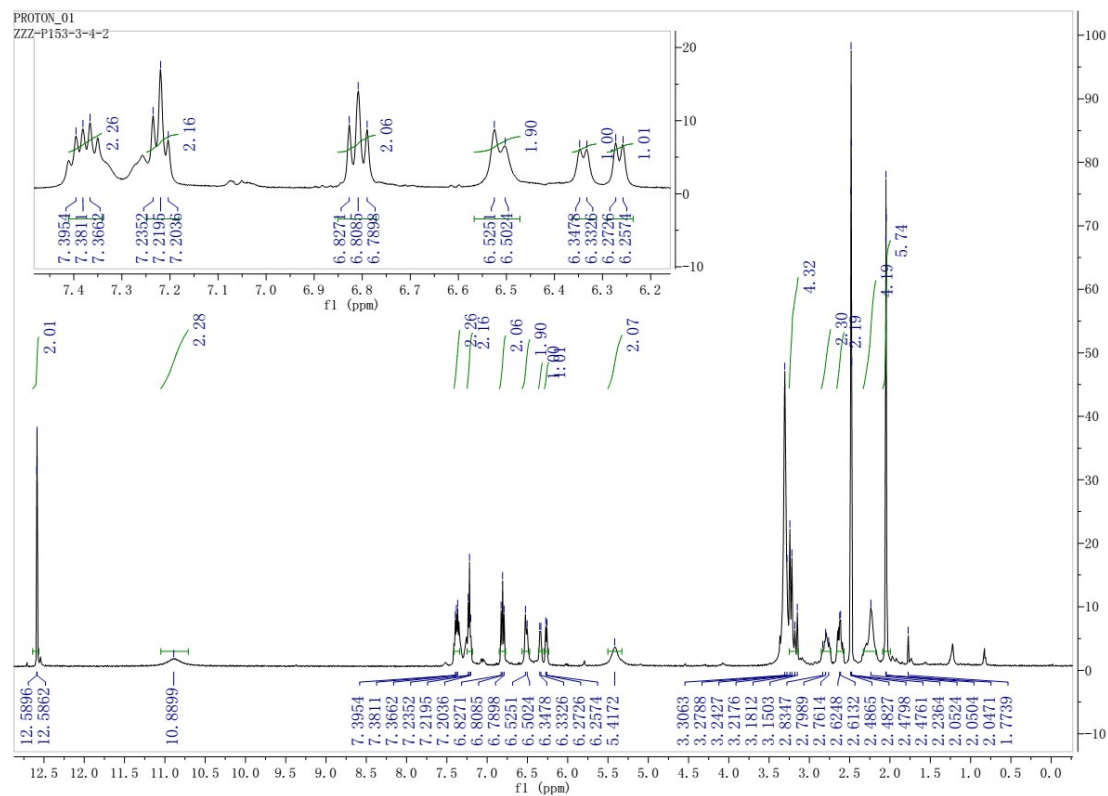

**Figure S41.**  $^{13}\text{C}$  NMR (125 MHz,  $\text{DMSO-}d_6$ ) spectrum of the mixture of **1** and **2**.

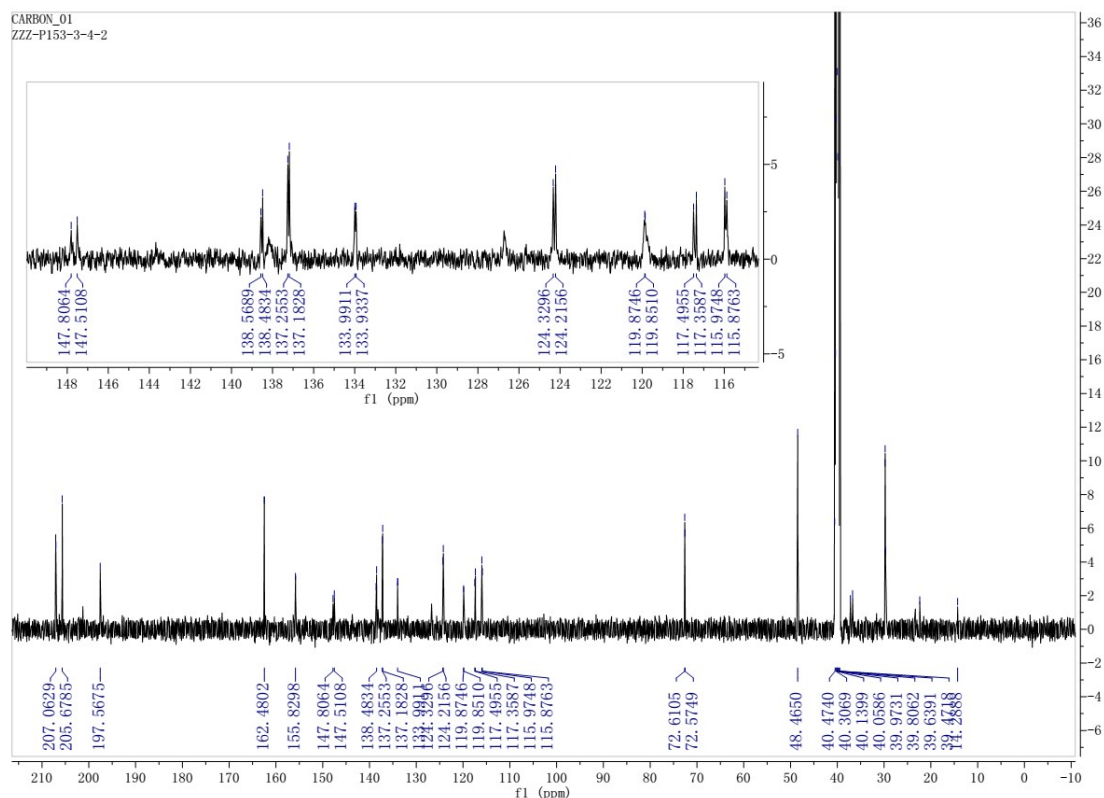

**Figure S42.** Chiral HPLC separation chromatogram of **1/2** on chiral Daicel Chiralpack IC column (250×4.6 mm,  $5\mu\text{m}$ ).

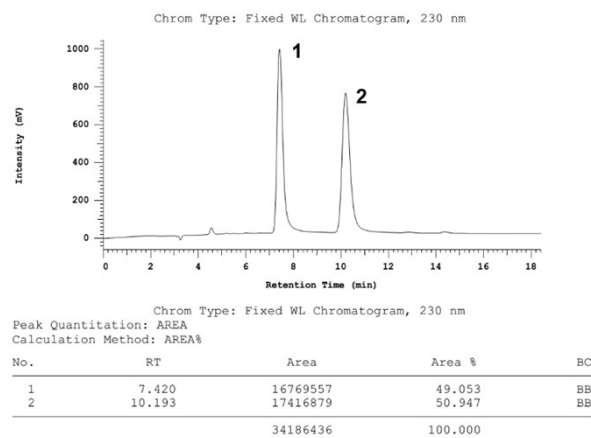

**Figure S43.** The structures of two reported synthetic tetralone and 1,3-indanone dimers.

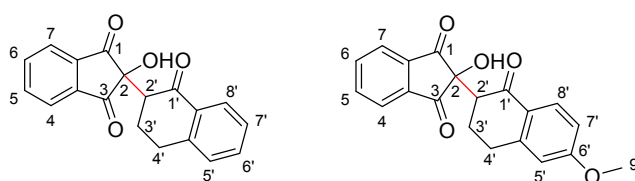



**Figure S44.** ECD calculation of **1**.

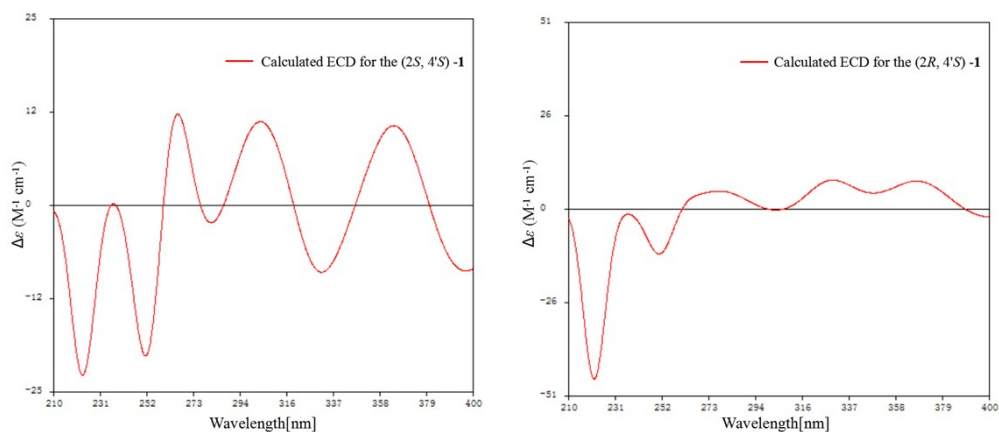

**Figure S44-1.** B3LYP/6-31+G(d) calculated spectra of (2*S*, 4'*S*)-**1** and (2*R*, 4'*S*)-**1** ( $\sigma = 0.18$  eV).

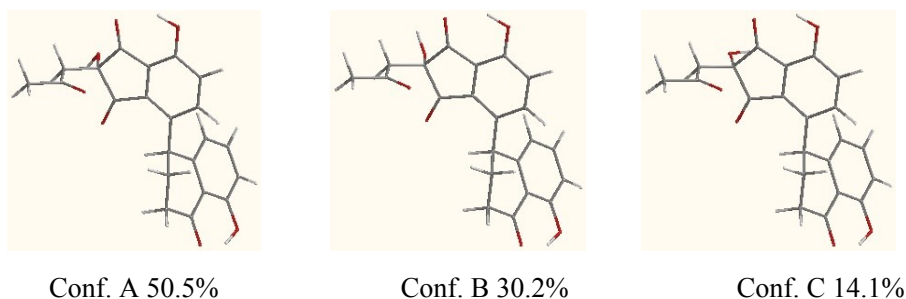

**Figure S44-2.** DFT-optimized structures for low-energy conformers of (2*S*, 4'*S*)-**1** at B3LYP/6-31+g (d) level in methanol (CPCM) (Conformer populations were calculated using the Gibbs free energy and Boltzmann population at 298 K estimated thereof).

**Table S1.** Cartesian coordinates of the low-energy reoptimized conformers of (2*S*, 4'*S*)-**1** calculated at B3LYP/6-31+G(d) level of theory with PCM solvent model for MeOH.

| Conformer A |      | Standard Orientation<br>(Ångstroms) |          |          |
|-------------|------|-------------------------------------|----------|----------|
| I           | Atom | X                                   | Y        | Z        |
| 1           | C    | 2.10426                             | 1.32441  | -0.36324 |
| 2           | C    | 1.07293                             | 0.41461  | -0.03863 |
| 3           | C    | -0.20635                            | 0.54934  | -0.58225 |
| 4           | C    | -0.39201                            | 1.64142  | -1.46187 |
| 5           | C    | 0.61902                             | 2.54167  | -1.79482 |
| 6           | C    | 1.90138                             | 2.3914   | -1.2442  |
| 7           | C    | 3.34873                             | 1.00344  | 0.31279  |
| 8           | C    | 3.09397                             | -0.18821 | 1.25555  |
| 9           | C    | 1.63371                             | -0.59294 | 0.9015   |
| 10          | C    | -1.33529                            | -0.43308 | -0.31039 |
| 11          | C    | -1.67252                            | -1.23078 | -1.58891 |

|    |   |          |          |          |
|----|---|----------|----------|----------|
| 12 | C | -2.79307 | -2.23435 | -1.31461 |
| 13 | C | -4.02582 | -1.58057 | -0.74041 |
| 14 | C | -3.86842 | -0.3664  | 0.06703  |
| 15 | C | -2.58514 | 0.21383  | 0.29024  |
| 16 | C | -5.01685 | 0.22953  | 0.66773  |
| 17 | C | -4.88629 | 1.36383  | 1.47885  |
| 18 | C | -3.62485 | 1.90227  | 1.6955   |
| 19 | C | -2.48293 | 1.33683  | 1.10823  |
| 20 | O | 2.88948  | 3.25487  | -1.56295 |
| 21 | O | -6.25602 | -0.27328 | 0.48646  |
| 22 | O | -5.14637 | -2.0945  | -0.93993 |
| 23 | O | 1.07765  | -1.55799 | 1.4023   |
| 24 | C | 4.1148   | -1.32173 | 1.15292  |
| 25 | O | 3.09533  | 0.37002  | 2.5753   |
| 26 | O | 4.41434  | 1.60579  | 0.1821   |
| 27 | C | 4.21547  | -1.96927 | -0.21718 |
| 28 | C | 5.23246  | -3.07107 | -0.38011 |
| 29 | O | 3.49486  | -1.60048 | -1.13759 |
| 30 | H | -1.37307 | 1.79565  | -1.90307 |
| 31 | H | 0.42359  | 3.36228  | -2.47846 |
| 32 | H | -0.96684 | -1.15497 | 0.42831  |
| 33 | H | -1.97675 | -0.54593 | -2.39072 |
| 34 | H | -0.77767 | -1.75671 | -1.93784 |
| 35 | H | -2.45315 | -2.98269 | -0.58161 |
| 36 | H | -3.08407 | -2.78284 | -2.21607 |
| 37 | H | -5.77589 | 1.79612  | 1.92654  |
| 38 | H | -3.51992 | 2.77953  | 2.32851  |
| 39 | H | -1.51319 | 1.7865   | 1.29399  |
| 40 | H | 3.70635  | 2.97955  | -1.08918 |
| 41 | H | -6.15902 | -1.07633 | -0.09572 |
| 42 | H | 5.10029  | -0.93517 | 1.44312  |
| 43 | H | 3.8646   | -2.10025 | 1.88703  |
| 44 | H | 2.79058  | -0.3131  | 3.19951  |
| 45 | H | 6.23858  | -2.68561 | -0.17356 |
| 46 | H | 5.19488  | -3.4748  | -1.39406 |
| 47 | H | 5.0433   | -3.87169 | 0.34539  |

| <b>Conformer B</b> |      | <b>Standard Orientation<br/>(Ångstroms)</b> |         |          |
|--------------------|------|---------------------------------------------|---------|----------|
| I                  | Atom | X                                           | Y       | Z        |
| 1                  | C    | 2.10183                                     | 1.32489 | -0.37282 |
| 2                  | C    | 1.07403                                     | 0.41453 | -0.03922 |

|    |   |          |          |          |
|----|---|----------|----------|----------|
| 3  | C | -0.20846 | 0.54646  | -0.57643 |
| 4  | C | -0.39967 | 1.63533  | -1.45886 |
| 5  | C | 0.60818  | 2.53599  | -1.80033 |
| 6  | C | 1.89302  | 2.38958  | -1.25485 |
| 7  | C | 3.34943  | 1.00167  | 0.29505  |
| 8  | C | 3.09917  | -0.18109 | 1.24947  |
| 9  | C | 1.63819  | -0.59277 | 0.90088  |
| 10 | C | -1.33602 | -0.43507 | -0.29553 |
| 11 | C | -1.66842 | -1.24626 | -1.56678 |
| 12 | C | -2.78912 | -2.24793 | -1.28616 |
| 13 | C | -4.02458 | -1.58883 | -0.7241  |
| 14 | C | -3.87065 | -0.3672  | 0.07274  |
| 15 | C | -2.58842 | 0.21544  | 0.29567  |
| 16 | C | -5.02148 | 0.23335  | 0.66422  |
| 17 | C | -4.89431 | 1.37429  | 1.46648  |
| 18 | C | -3.63376 | 1.91467  | 1.68367  |
| 19 | C | -2.4896  | 1.34491  | 1.10512  |
| 20 | O | 2.87865  | 3.25381  | -1.58036 |
| 21 | O | -6.25988 | -0.27133 | 0.4825   |
| 22 | O | -5.14422 | -2.10453 | -0.92399 |
| 23 | O | 1.09046  | -1.57198 | 1.37702  |
| 24 | C | 4.11436  | -1.31978 | 1.15852  |
| 25 | O | 3.02454  | 0.32375  | 2.5892   |
| 26 | O | 4.4144   | 1.61056  | 0.17108  |
| 27 | C | 4.20903  | -1.98121 | -0.20556 |
| 28 | C | 5.21875  | -3.09092 | -0.35915 |
| 29 | O | 3.48853  | -1.61758 | -1.12804 |
| 30 | H | -1.38332 | 1.78684  | -1.89524 |
| 31 | H | 0.40803  | 3.35368  | -2.48612 |
| 32 | H | -0.96743 | -1.14883 | 0.45084  |
| 33 | H | -1.97044 | -0.56965 | -2.37644 |
| 34 | H | -0.77196 | -1.77491 | -1.90735 |
| 35 | H | -2.45148 | -2.98771 | -0.54347 |
| 36 | H | -3.07593 | -2.80659 | -2.1827  |
| 37 | H | -5.78572 | 1.80998  | 1.9072   |
| 38 | H | -3.53137 | 2.79692  | 2.31014  |
| 39 | H | -1.5206  | 1.79612  | 1.29103  |
| 40 | H | 3.69731  | 2.98332  | -1.10733 |
| 41 | H | -6.16046 | -1.07917 | -0.09252 |
| 42 | H | 5.10925  | -0.94518 | 1.43641  |
| 43 | H | 3.85411  | -2.08028 | 1.90612  |
| 44 | H | 3.88989  | 0.69985  | 2.83093  |
| 45 | H | 5.03186  | -3.87869 | 0.38073  |

|    |   |         |          |          |
|----|---|---------|----------|----------|
| 46 | H | 6.2285  | -2.70716 | -0.16734 |
| 47 | H | 5.17103 | -3.51036 | -1.36627 |

| Conformer C |      | Standard Orientation<br>(Ångstroms) |          |          |
|-------------|------|-------------------------------------|----------|----------|
| I           | Atom | X                                   | Y        | Z        |
| 1           | C    | 2.10815                             | 1.31875  | -0.36627 |
| 2           | C    | 1.07448                             | 0.41324  | -0.03232 |
| 3           | C    | -0.20286                            | 0.54331  | -0.58209 |
| 4           | C    | -0.3852                             | 1.62606  | -1.47386 |
| 5           | C    | 0.62754                             | 2.52113  | -1.81588 |
| 6           | C    | 1.90862                             | 2.37469  | -1.26185 |
| 7           | C    | 3.35449                             | 0.9992   | 0.30805  |
| 8           | C    | 3.09699                             | -0.18207 | 1.26657  |
| 9           | C    | 1.63151                             | -0.58927 | 0.91869  |
| 10          | C    | -1.33397                            | -0.43485 | -0.30362 |
| 11          | C    | -1.67095                            | -1.24168 | -1.5764  |
| 12          | C    | -2.7933                             | -2.2415  | -1.29568 |
| 13          | C    | -4.02569                            | -1.5815  | -0.72792 |
| 14          | C    | -3.86726                            | -0.36146 | 0.07051  |
| 15          | C    | -2.58339                            | 0.21859  | 0.29055  |
| 16          | C    | -5.0154                             | 0.24063  | 0.66558  |
| 17          | C    | -4.88398                            | 1.38077  | 1.46838  |
| 18          | C    | -3.622                              | 1.91908  | 1.68208  |
| 19          | C    | -2.4804                             | 1.34771  | 1.09996  |
| 20          | O    | 2.90001                             | 3.23052  | -1.58986 |
| 21          | O    | -6.25509                            | -0.26169 | 0.48682  |
| 22          | O    | -5.14684                            | -2.09504 | -0.92486 |
| 23          | O    | 1.07137                             | -1.55504 | 1.41054  |
| 24          | C    | 4.10318                             | -1.32398 | 1.15635  |
| 25          | O    | 3.17556                             | 0.25476  | 2.62837  |
| 26          | O    | 4.41924                             | 1.60492  | 0.17236  |
| 27          | C    | 4.18657                             | -1.97349 | -0.21169 |
| 28          | C    | 5.1988                              | -3.07917 | -0.37951 |
| 29          | O    | 3.45944                             | -1.6063  | -1.12761 |
| 30          | H    | -1.36557                            | 1.77741  | -1.91762 |
| 31          | H    | 0.43415                             | 3.33417  | -2.50907 |
| 32          | H    | -0.96733                            | -1.15155 | 0.44089  |
| 33          | H    | -1.9734                             | -0.5626  | -2.38377 |
| 34          | H    | -0.77652                            | -1.77158 | -1.92034 |
| 35          | H    | -2.4553                             | -2.9846  | -0.55649 |
| 36          | H    | -3.08405                            | -2.79652 | -2.19322 |

|    |   |          |          |          |
|----|---|----------|----------|----------|
| 37 | H | -5.77338 | 1.8176   | 1.91203  |
| 38 | H | -3.51646 | 2.8009   | 2.30864  |
| 39 | H | -1.51011 | 1.7973   | 1.28314  |
| 40 | H | 3.71515  | 2.9575   | -1.11102 |
| 41 | H | -6.15868 | -1.0692  | -0.08932 |
| 42 | H | 5.0951   | -0.94847 | 1.43922  |
| 43 | H | 3.84326  | -2.09022 | 1.89841  |
| 44 | H | 2.57243  | 1.00368  | 2.78104  |
| 45 | H | 6.20948  | -2.68904 | -0.20612 |
| 46 | H | 5.13651  | -3.5002  | -1.38513 |
| 47 | H | 5.02958  | -3.86666 | 0.36479  |

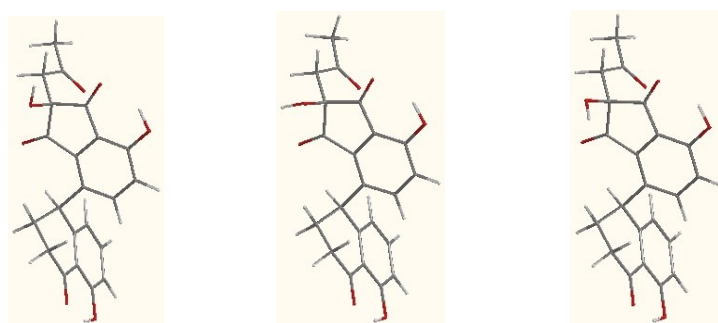

Conf. A 52.8%

Conf. B 32.6%

Conf. C 14.6%

**Figure S44-3.** DFT-optimized structures for low-energy conformers of (2*R*, 4'*S*)-**1** at B3LYP/6-31+g (d) level in methanol (CPCM) (Conformer populations were calculated using the Gibbs free energy and Boltzmann population at 298 K estimated thereof).

**Table S2.** Cartesian coordinates of the low-energy reoptimized conformers of (2*R*, 4'*S*)-**1** calculated at B3LYP/6-31+G(d) level of theory with PCM solvent model for MeOH.

| Conformer A |      | Standard Orientation<br>(Ångstroms) |          |          |
|-------------|------|-------------------------------------|----------|----------|
| I           | Atom | X                                   | Y        | Z        |
| 1           | C    | 1.88582                             | -1.28271 | -0.54823 |
| 2           | C    | 1.04007                             | -0.40728 | 0.16523  |
| 3           | C    | -0.34053                            | -0.37637 | -0.07028 |
| 4           | C    | -0.81121                            | -1.27245 | -1.05501 |
| 5           | C    | 0.01587                             | -2.14786 | -1.76236 |
| 6           | C    | 1.39563                             | -2.1633  | -1.5184  |
| 7           | C    | 3.27816                             | -1.12061 | -0.16512 |
| 8           | C    | 3.35096                             | -0.10457 | 0.99014  |
| 9           | C    | 1.88169                             | 0.40099  | 1.08611  |
| 10          | C    | -1.26716                            | 0.55895  | 0.70937  |

|    |   |          |          |          |
|----|---|----------|----------|----------|
| 11 | C | -1.62681 | -0.01155 | 2.10171  |
| 12 | C | -2.63669 | -1.15647 | 1.99899  |
| 13 | C | -3.86868 | -0.78114 | 1.20851  |
| 14 | C | -3.76308 | 0.26929  | 0.18929  |
| 15 | C | -2.52709 | 0.92697  | -0.06328 |
| 16 | C | -4.9151  | 0.64369  | -0.56399 |
| 17 | C | -4.82865 | 1.64791  | -1.53675 |
| 18 | C | -3.61082 | 2.27865  | -1.76268 |
| 19 | C | -2.46643 | 1.92434  | -1.03292 |
| 20 | O | 2.20724  | -2.99552 | -2.20763 |
| 21 | O | -6.11322 | 0.05369  | -0.37135 |
| 22 | O | -4.94528 | -1.37491 | 1.42382  |
| 23 | O | 1.53025  | 1.29716  | 1.83396  |
| 24 | C | 4.39046  | 1.00373  | 0.82622  |
| 25 | O | 3.57011  | -0.82243 | 2.21151  |
| 26 | O | 4.23313  | -1.73986 | -0.63781 |
| 27 | C | 4.20722  | 1.87737  | -0.40281 |
| 28 | C | 5.18632  | 3.00954  | -0.58847 |
| 29 | O | 3.29566  | 1.66246  | -1.19348 |
| 30 | H | -1.87037 | -1.28227 | -1.29353 |
| 31 | H | -0.40326 | -2.81402 | -2.51038 |
| 32 | H | -0.70712 | 1.4833   | 0.87682  |
| 33 | H | -0.72252 | -0.34987 | 2.61621  |
| 34 | H | -2.05356 | 0.7999   | 2.70436  |
| 35 | H | -2.18406 | -2.02586 | 1.49841  |
| 36 | H | -2.96053 | -1.50283 | 2.98579  |
| 37 | H | -5.7199  | 1.91561  | -2.09604 |
| 38 | H | -3.54666 | 3.06176  | -2.51355 |
| 39 | H | -1.52509 | 2.43291  | -1.22263 |
| 40 | H | 3.13166  | -2.84735 | -1.90771 |
| 41 | H | -5.98704 | -0.63081 | 0.34104  |
| 42 | H | 5.39443  | 0.55807  | 0.79074  |
| 43 | H | 4.36954  | 1.63688  | 1.72257  |
| 44 | H | 4.43831  | -1.26115 | 2.16369  |
| 45 | H | 4.99838  | 3.52244  | -1.53409 |
| 46 | H | 5.08896  | 3.72224  | 0.24041  |
| 47 | H | 6.21604  | 2.63351  | -0.56597 |

| <b>Conformer B</b> |      | Standard Orientation<br>(Ångstroms) |   |   |
|--------------------|------|-------------------------------------|---|---|
| I                  | Atom | X                                   | Y | Z |

|    |   |          |          |          |
|----|---|----------|----------|----------|
| 1  | C | 1.89149  | -1.2604  | -0.56875 |
| 2  | C | 1.03922  | -0.41087 | 0.16808  |
| 3  | C | -0.33923 | -0.37157 | -0.0765  |
| 4  | C | -0.80132 | -1.22781 | -1.10013 |
| 5  | C | 0.03196  | -2.076   | -1.83281 |
| 6  | C | 1.4094   | -2.10308 | -1.57639 |
| 7  | C | 3.28143  | -1.11788 | -0.16888 |
| 8  | C | 3.34899  | -0.12393 | 1.00645  |
| 9  | C | 1.87616  | 0.36318  | 1.12038  |
| 10 | C | -1.27119 | 0.53296  | 0.7323   |
| 11 | C | -1.63796 | -0.09111 | 2.09965  |
| 12 | C | -2.64491 | -1.23295 | 1.94698  |
| 13 | C | -3.87299 | -0.8298  | 1.16414  |
| 14 | C | -3.7635  | 0.25951  | 0.18695  |
| 15 | C | -2.52747 | 0.92925  | -0.0322  |
| 16 | C | -4.91194 | 0.6614   | -0.55742 |
| 17 | C | -4.82229 | 1.70406  | -1.48864 |
| 18 | C | -3.60464 | 2.34572  | -1.68224 |
| 19 | C | -2.46347 | 1.9645   | -0.96094 |
| 20 | O | 2.22651  | -2.90977 | -2.28838 |
| 21 | O | -6.10981 | 0.06167  | -0.39563 |
| 22 | O | -4.94953 | -1.43351 | 1.34985  |
| 23 | O | 1.51885  | 1.20395  | 1.93088  |
| 24 | C | 4.38266  | 0.99223  | 0.84581  |
| 25 | O | 3.64838  | -0.91929 | 2.15978  |
| 26 | O | 4.2362   | -1.71413 | -0.66626 |
| 27 | C | 4.19451  | 1.87679  | -0.37473 |
| 28 | C | 5.25479  | 2.91822  | -0.63227 |
| 29 | O | 3.22288  | 1.73532  | -1.10831 |
| 30 | H | -1.85795 | -1.2263  | -1.34988 |
| 31 | H | -0.3804  | -2.7121  | -2.61018 |
| 32 | H | -0.71298 | 1.45072  | 0.93847  |
| 33 | H | -0.73594 | -0.44733 | 2.6059   |
| 34 | H | -2.06974 | 0.69601  | 2.73034  |
| 35 | H | -2.18764 | -2.08143 | 1.41571  |
| 36 | H | -2.9737  | -1.61776 | 2.91776  |
| 37 | H | -5.71104 | 1.99226  | -2.04167 |
| 38 | H | -3.53803 | 3.15859  | -2.40056 |
| 39 | H | -1.52214 | 2.48185  | -1.12503 |
| 40 | H | 3.14854  | -2.77125 | -1.97584 |
| 41 | H | -5.98635 | -0.65031 | 0.28973  |
| 42 | H | 5.38382  | 0.54361  | 0.82022  |
| 43 | H | 4.35851  | 1.63389  | 1.73815  |

|    |   |         |          |          |
|----|---|---------|----------|----------|
| 44 | H | 3.54362 | -0.36381 | 2.95329  |
| 45 | H | 4.95119 | 3.57437  | -1.45081 |
| 46 | H | 5.44623 | 3.50862  | 0.27124  |
| 47 | H | 6.1979  | 2.42194  | -0.89535 |

| Conformer C |      | Standard Orientation<br>(Ångstroms) |          |          |
|-------------|------|-------------------------------------|----------|----------|
| I           | Atom | X                                   | Y        | Z        |
| 1           | C    | 1.89804                             | -1.26938 | -0.56591 |
| 2           | C    | 1.04603                             | -0.42362 | 0.17738  |
| 3           | C    | -0.33259                            | -0.38246 | -0.06834 |
| 4           | C    | -0.79531                            | -1.23501 | -1.0946  |
| 5           | C    | 0.03726                             | -2.08007 | -1.83196 |
| 6           | C    | 1.41498                             | -2.10645 | -1.57808 |
| 7           | C    | 3.29118                             | -1.11805 | -0.17757 |
| 8           | C    | 3.36127                             | -0.12715 | 1.0035   |
| 9           | C    | 1.88271                             | 0.35424  | 1.12952  |
| 10          | C    | -1.26456                            | 0.52148  | 0.74118  |
| 11          | C    | -1.63624                            | -0.10463 | 2.10618  |
| 12          | C    | -2.64609                            | -1.24321 | 1.9487   |
| 13          | C    | -3.87144                            | -0.83446 | 1.16429  |
| 14          | C    | -3.7566                             | 0.25673  | 0.18994  |
| 15          | C    | -2.518                              | 0.92287  | -0.02534 |
| 16          | C    | -4.90226                            | 0.66381  | -0.55599 |
| 17          | C    | -4.80741                            | 1.70819  | -1.48472 |
| 18          | C    | -3.5873                             | 2.34635  | -1.67447 |
| 19          | C    | -2.44882                            | 1.95991  | -0.95176 |
| 20          | O    | 2.23305                             | -2.90639 | -2.2963  |
| 21          | O    | -6.1023                             | 0.06748  | -0.39782 |
| 22          | O    | -4.95012                            | -1.43545 | 1.34635  |
| 23          | O    | 1.51933                             | 1.2049   | 1.92522  |
| 24          | C    | 4.37144                             | 1.00405  | 0.82751  |
| 25          | O    | 3.76725                             | -0.79979 | 2.20039  |
| 26          | O    | 4.24332                             | -1.71748 | -0.67931 |
| 27          | C    | 4.14683                             | 1.89276  | -0.38099 |
| 28          | C    | 5.12355                             | 3.02515  | -0.58055 |
| 29          | O    | 3.2117                              | 1.69162  | -1.14728 |
| 30          | H    | -1.85231                            | -1.23319 | -1.34282 |
| 31          | H    | -0.376                              | -2.71311 | -2.61136 |
| 32          | H    | -0.70444                            | 1.43708  | 0.95106  |
| 33          | H    | -0.73645                            | -0.46436 | 2.614    |



|    |   |          |          |          |
|----|---|----------|----------|----------|
| 34 | H | -2.06727 | 0.68228  | 2.73761  |
| 35 | H | -2.19028 | -2.09173 | 1.41619  |
| 36 | H | -2.97806 | -1.6294  | 2.91784  |
| 37 | H | -5.69411 | 2.0005   | -2.03889 |
| 38 | H | -3.51665 | 3.1606   | -2.39084 |
| 39 | H | -1.50555 | 2.47469  | -1.11278 |
| 40 | H | 3.15531  | -2.76582 | -1.98431 |
| 41 | H | -5.98233 | -0.6464  | 0.28619  |
| 42 | H | 5.37753  | 0.56863  | 0.76952  |
| 43 | H | 4.35863  | 1.62394  | 1.73347  |
| 44 | H | 3.17422  | -1.5483  | 2.38895  |
| 45 | H | 4.88457  | 3.57507  | -1.4932  |
| 46 | H | 5.08733  | 3.70576  | 0.27934  |
| 47 | H | 6.14817  | 2.63823  | -0.63743 |

**Figure S45.** ECD calculation of **5**.

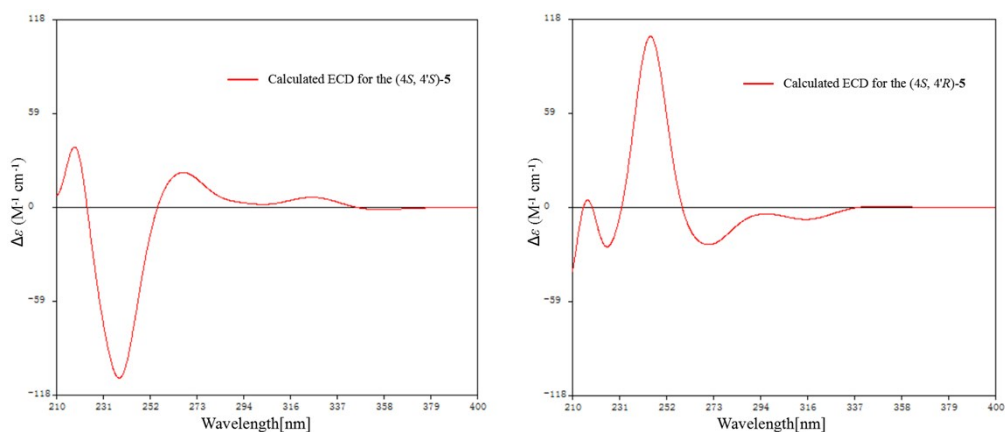

**Figure S45-1.** B3LYP/6-31+G(d) calculated spectra of (4*S*, 4'*S*)-**5** and (4*S*, 4'*R*)-**5** ( $\sigma = 0.20$  eV).

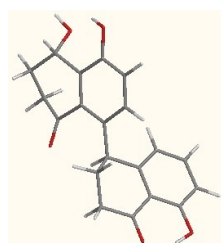

Conf. A 60.7%

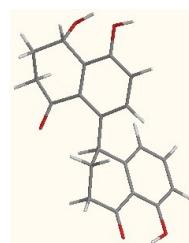

Conf. B 35.0%

**Figure S45-2.** DFT-optimized structures for low-energy conformers of (4*S*, 4'*S*)-**5** at B3LYP/6-31+g (d) level in methanol (CPCM) (Conformer populations were calculated using the Gibbs free energy and Boltzmann population at 298 K estimated thereof).

**Table S3.** Cartesian coordinates of the low-energy reoptimized conformers of (4*S*, 4'*S*)-**5** calculated at B3LYP/6-31+G(d) level of theory with PCM solvent model for MeOH.

| Conformer A |      | Standard Orientation<br>(Ångstroms) |          |          |
|-------------|------|-------------------------------------|----------|----------|
| I           | Atom | X                                   | Y        | Z        |
| 1           | C    | -2.97307                            | -0.27906 | -0.35994 |
| 2           | C    | -1.78621                            | 0.43587  | -0.04718 |
| 3           | C    | -0.53072                            | -0.01961 | -0.52573 |
| 4           | C    | -0.51189                            | -1.17643 | -1.31992 |
| 5           | C    | -1.66262                            | -1.89865 | -1.60945 |
| 6           | C    | -2.8908                             | -1.46586 | -1.10603 |
| 7           | C    | -4.36348                            | 0.19316  | 0.03061  |

|    |   |          |          |          |
|----|---|----------|----------|----------|
| 8  | C | -4.39216 | 1.52095  | 0.7886   |
| 9  | C | -3.17024 | 1.67914  | 1.70081  |
| 10 | C | -1.9262  | 1.63767  | 0.83912  |
| 11 | C | 0.80226  | 0.67109  | -0.24413 |
| 12 | C | 1.30365  | 1.38581  | -1.5168  |
| 13 | C | 2.64773  | 2.06915  | -1.26431 |
| 14 | C | 3.68912  | 1.11148  | -0.74124 |
| 15 | C | 3.25162  | -0.02179 | 0.08025  |
| 16 | C | 1.86909  | -0.2569  | 0.34029  |
| 17 | C | 4.22957  | -0.8785  | 0.6691   |
| 18 | C | 3.84124  | -1.92513 | 1.51334  |
| 19 | C | 2.49035  | -2.12063 | 1.77389  |
| 20 | C | 1.5127   | -1.29992 | 1.19423  |
| 21 | O | -4.94681 | -0.89485 | 0.80383  |
| 22 | O | -3.99989 | -2.21862 | -1.3813  |
| 23 | O | -1.11166 | 2.55902  | 0.86187  |
| 24 | O | 4.89679  | 1.31705  | -0.98664 |
| 25 | O | 5.55068  | -0.70812 | 0.44626  |
| 26 | H | 0.43933  | -1.54317 | -1.69605 |
| 27 | H | -1.62108 | -2.8052  | -2.20631 |
| 28 | H | -4.96097 | 0.29688  | -0.88622 |
| 29 | H | -4.41147 | 2.34193  | 0.0606   |
| 30 | H | -5.32197 | 1.59065  | 1.36421  |
| 32 | H | -3.19109 | 2.62711  | 2.24447  |
| 32 | H | -3.13698 | 0.85906  | 2.43085  |
| 33 | H | 0.63299  | 1.45382  | 0.49997  |
| 34 | H | 0.56099  | 2.12704  | -1.8301  |
| 35 | H | 1.40433  | 0.66397  | -2.33772 |
| 36 | H | 3.04343  | 2.54934  | -2.16499 |
| 37 | H | 2.52785  | 2.85953  | -0.50654 |
| 38 | H | 4.60522  | -2.55909 | 1.95293  |
| 39 | H | 2.18549  | -2.92807 | 2.43475  |
| 40 | H | 0.46597  | -1.48801 | 1.40899  |
| 41 | H | -5.89012 | -0.70263 | 0.94269  |
| 42 | H | -4.66608 | -2.03294 | -0.68375 |
| 43 | H | 5.64161  | 0.08294  | -0.153   |

| <b>Conformer B</b> |      | <b>Standard Orientation<br/>(Ångstroms)</b> |          |         |
|--------------------|------|---------------------------------------------|----------|---------|
| I                  | Atom | X                                           | Y        | Z       |
| 1                  | C    | 2.98524                                     | -0.28103 | 0.36256 |

|    |   |          |          |          |
|----|---|----------|----------|----------|
| 2  | C | 1.80019  | 0.43726  | 0.05663  |
| 3  | C | 0.54102  | -0.01878 | 0.53079  |
| 4  | C | 0.51871  | -1.17028 | 1.32886  |
| 5  | C | 1.67372  | -1.87656 | 1.64887  |
| 6  | C | 2.8991   | -1.43776 | 1.14973  |
| 7  | C | 4.37296  | 0.11224  | -0.13341 |
| 8  | C | 4.42295  | 1.50088  | -0.75717 |
| 9  | C | 3.19358  | 1.76204  | -1.63645 |
| 10 | C | 1.94503  | 1.67014  | -0.78766 |
| 11 | C | -0.79183 | 0.66899  | 0.2391   |
| 12 | C | -1.29686 | 1.39715  | 1.50236  |
| 13 | C | -2.63878 | 2.07988  | 1.23785  |
| 14 | C | -3.67944 | 1.1187   | 0.72008  |
| 15 | C | -3.24048 | -0.02375 | -0.08793 |
| 16 | C | -1.85726 | -0.26429 | -0.33961 |
| 17 | C | -4.21776 | -0.88379 | -0.67307 |
| 18 | C | -3.82807 | -1.93922 | -1.50568 |
| 19 | C | -2.47654 | -2.1399  | -1.75864 |
| 20 | C | -1.49956 | -1.31586 | -1.18252 |
| 21 | O | 4.82744  | -0.83153 | -1.13111 |
| 22 | O | 4.07368  | -2.11287 | 1.38341  |
| 23 | O | 1.12192  | 2.5846   | -0.77875 |
| 24 | O | -4.88785 | 1.32898  | 0.95782  |
| 25 | O | -5.53944 | -0.7082  | -0.45799 |
| 26 | H | -0.43302 | -1.54065 | 1.69957  |
| 27 | H | 1.61891  | -2.7676  | 2.27011  |
| 28 | H | 5.06861  | 0.07388  | 0.71348  |
| 29 | H | 4.46717  | 2.25061  | 0.04284  |
| 30 | H | 5.34576  | 1.59404  | -1.33878 |
| 32 | H | 3.22693  | 2.75147  | -2.1004  |
| 32 | H | 3.14015  | 1.00816  | -2.43395 |
| 33 | H | -0.62052 | 1.44368  | -0.51271 |
| 34 | H | -0.55425 | 2.14042  | 1.81045  |
| 35 | H | -1.40167 | 0.68338  | 2.32988  |
| 36 | H | -3.03741 | 2.56962  | 2.13209  |
| 37 | H | -2.51468 | 2.86269  | 0.4729   |
| 38 | H | -4.59154 | -2.57551 | -1.94275 |
| 39 | H | -2.17064 | -2.95381 | -2.41104 |
| 40 | H | -0.45246 | -1.50775 | -1.39192 |
| 41 | H | 4.90293  | -1.69726 | -0.69384 |
| 42 | H | 3.91554  | -2.88875 | 1.94596  |
| 43 | H | -5.63128 | 0.08914  | 0.13289  |

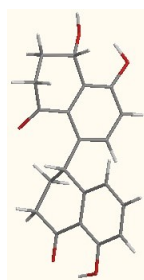

Conf. A 91.5%

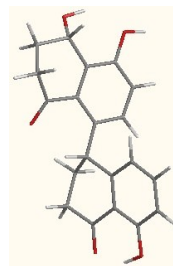

Conf. B 6.5%

**Figure S45-3.** DFT-optimized structures for low-energy conformers of (4*S*, 4'*R*)-**5** at B3LYP/6-31+g (d) level in methanol (CPCM) (Conformer populations were calculated using the Gibbs free energy and Boltzmann population at 298 K estimated thereof).

**Table S4.** Cartesian coordinates of the low-energy reoptimized conformers of (4*S*, 4'*R*)-**5** calculated at B3LYP/6-31+G(d) level of theory with PCM solvent model for MeOH.

| Conformer A |      | Standard Orientation<br>(Ångstroms) |          |          |
|-------------|------|-------------------------------------|----------|----------|
| I           | Atom | X                                   | Y        | Z        |
| 1           | C    | 2.96658                             | -0.40155 | -0.13409 |
| 2           | C    | 1.78085                             | 0.36322  | 0.06879  |
| 3           | C    | 0.53233                             | -0.09294 | -0.42809 |
| 4           | C    | 0.51377                             | -1.29447 | -1.15061 |
| 5           | C    | 1.66537                             | -2.03066 | -1.38767 |
| 6           | C    | 2.89089                             | -1.59697 | -0.87468 |
| 7           | C    | 4.29866                             | -0.01561 | 0.49776  |
| 8           | C    | 4.36255                             | 1.42633  | 0.98228  |
| 9           | C    | 3.09043                             | 1.7672   | 1.76755  |
| 10          | C    | 1.90148                             | 1.64365  | 0.84114  |
| 11          | C    | -0.79697                            | 0.63644  | -0.23716 |
| 12          | C    | -1.23839                            | 1.28642  | -1.56511 |
| 13          | C    | -2.57696                            | 2.0066   | -1.40052 |
| 14          | C    | -3.65491                            | 1.09731  | -0.86568 |
| 15          | C    | -3.26934                            | 0.00381  | 0.03226  |
| 16          | C    | -1.90205                            | -0.23991 | 0.35729  |
| 17          | C    | -4.28473                            | -0.80083 | 0.63119  |
| 18          | C    | -3.94815                            | -1.80409 | 1.54722  |
| 19          | C    | -2.61185                            | -2.00747 | 1.86963  |
| 20          | C    | -1.59787                            | -1.23815 | 1.28201  |
| 21          | O    | 5.35062                             | -0.26514 | -0.47131 |

|    |   |          |          |          |
|----|---|----------|----------|----------|
| 22 | O | 3.97547  | -2.39408 | -1.10753 |
| 23 | O | 1.10932  | 2.57652  | 0.71503  |
| 24 | O | -4.84881 | 1.30983  | -1.16655 |
| 25 | O | -5.5933  | -0.62035 | 0.34978  |
| 26 | H | -0.432   | -1.66838 | -1.53334 |
| 27 | H | 1.63345  | -2.95206 | -1.96211 |
| 28 | H | 4.46597  | -0.68956 | 1.35305  |
| 29 | H | 4.45868  | 2.09072  | 0.11436  |
| 30 | H | 5.25046  | 1.56946  | 1.60837  |
| 32 | H | 2.97117  | 1.06836  | 2.60822  |
| 32 | H | 3.12045  | 2.78341  | 2.16879  |
| 33 | H | -0.64461 | 1.45658  | 0.46874  |
| 34 | H | -1.32374 | 0.5208   | -2.34721 |
| 35 | H | -0.47053 | 1.99541  | -1.89143 |
| 36 | H | -2.46866 | 2.83447  | -0.68197 |
| 37 | H | -2.93053 | 2.44431  | -2.33957 |
| 38 | H | -4.74004 | -2.3985  | 1.9926   |
| 39 | H | -2.34733 | -2.78074 | 2.58638  |
| 40 | H | -0.56354 | -1.43112 | 1.54646  |
| 41 | H | 6.2071   | -0.22858 | -0.01258 |
| 42 | H | 4.78411  | -1.85641 | -0.93975 |
| 43 | H | -5.64692 | 0.13748  | -0.29527 |

| <b>Conformer B</b> |      | Standard Orientation<br>(Ångstroms) |          |          |
|--------------------|------|-------------------------------------|----------|----------|
| I                  | Atom | X                                   | Y        | Z        |
| 1                  | C    | -2.97405                            | 0.40285  | -0.108   |
| 2                  | C    | -1.78594                            | -0.35005 | 0.09212  |
| 3                  | C    | -0.53992                            | 0.11352  | -0.40873 |
| 4                  | C    | -0.52702                            | 1.31986  | -1.11992 |
| 5                  | C    | -1.68016                            | 2.06944  | -1.32554 |
| 6                  | C    | -2.89112                            | 1.61809  | -0.80419 |
| 7                  | C    | -4.34638                            | -0.02275 | 0.41941  |
| 8                  | C    | -4.36542                            | -1.42462 | 1.01613  |
| 9                  | C    | -3.09143                            | -1.69559 | 1.82544  |
| 10                 | C    | -1.90525                            | -1.61364 | 0.89116  |
| 11                 | C    | 0.78723                             | -0.62332 | -0.23451 |
| 12                 | C    | 1.20949                             | -1.26973 | -1.57064 |
| 13                 | C    | 2.54122                             | -2.0056  | -1.421   |
| 14                 | C    | 3.6334                              | -1.11159 | -0.88926 |
| 15                 | C    | 3.26719                             | -0.01729 | 0.01596  |

|    |   |          |          |          |
|----|---|----------|----------|----------|
| 16 | C | 1.90533  | 0.24052  | 0.35286  |
| 17 | C | 4.29612  | 0.77414  | 0.60918  |
| 18 | C | 3.9778   | 1.77878  | 1.53036  |
| 19 | C | 2.64653  | 1.99616  | 1.86379  |
| 20 | C | 1.61939  | 1.23948  | 1.28241  |
| 21 | O | -5.34972 | -0.01344 | -0.60943 |
| 22 | O | -4.05396 | 2.34312  | -0.94237 |
| 23 | O | -1.11849 | -2.55328 | 0.78514  |
| 24 | O | 4.82254  | -1.33689 | -1.19932 |
| 25 | O | 5.60025  | 0.57975  | 0.31728  |
| 26 | H | 0.4139   | 1.69834  | -1.50933 |
| 27 | H | -1.63618 | 3.00522  | -1.8784  |
| 28 | H | -4.63426 | 0.70155  | 1.19796  |
| 29 | H | -4.44307 | -2.15072 | 0.19662  |
| 30 | H | -5.25549 | -1.54527 | 1.6421   |
| 32 | H | -2.98218 | -0.9454  | 2.62174  |
| 32 | H | -3.10933 | -2.68642 | 2.2868   |
| 33 | H | 0.63451  | -1.44655 | 0.4681   |
| 34 | H | 1.29669  | -0.50017 | -2.34868 |
| 35 | H | 0.43119  | -1.96824 | -1.89495 |
| 36 | H | 2.42935  | -2.83675 | -0.70685 |
| 37 | H | 2.88247  | -2.44127 | -2.36553 |
| 38 | H | 4.77972  | 2.36301  | 1.97125  |
| 39 | H | 2.39627  | 2.7703   | 2.58469  |
| 40 | H | 0.58953  | 1.44268  | 1.55648  |
| 41 | H | -5.40473 | 0.896    | -0.9532  |
| 42 | H | -3.89581 | 3.15484  | -1.45188 |
| 43 | H | 5.64039  | -0.17738 | -0.32965 |

**Figure S46.** ECD calculated spectra of four absolute configurations of **1**

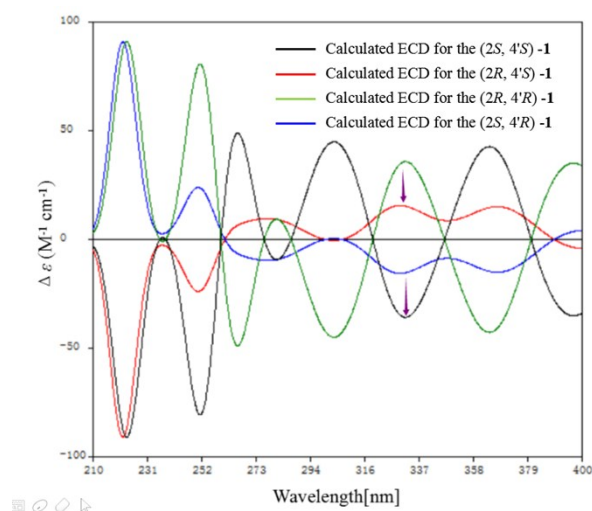

Supplement: c6ra14640f1.pdf [file c6ra14640f1.pdf]
